1 High sorbic acid resistance of *Penicillium roqueforti* is  
2 mediated by the SORBUS gene cluster

3

4 Maarten Punt<sup>1,2</sup>, Sjoerd J. Seekles<sup>1,3</sup>, Jisca L. van Dam<sup>3</sup>, Connor de Adelhart Toorop<sup>2</sup>, Raithele R  
5 Martina<sup>2</sup>, Jos Houbraeken<sup>1,4</sup>, Arthur F. J. Ram<sup>1,3</sup>, Han A. B. Wösten<sup>1,2</sup>, Robin A. Ohm<sup>1,2</sup>

6

7 <sup>1</sup>TiFN, P.O. Box 557, 6700 AN, Wageningen, The Netherlands;

8 <sup>2</sup>Microbiology, Department of Biology, Utrecht University, Padualaan 8, 3584 CH, Utrecht, The  
9 Netherlands;

10 <sup>3</sup>Department Molecular Microbiology and Biotechnology, Institute of Biology Leiden, Leiden  
11 University, Sylviusweg 72, 2333 BE Leiden, the Netherlands;

12 <sup>4</sup>Westerdijk Fungal Biodiversity Institute, Uppsalalaan 8, 3584 CT Utrecht, The Netherlands;

13

14 **Abstract**

15 *Penicillium roqueforti* is a major food-spoilage fungus known for its high resistance to the food  
16 preservative sorbic acid. Here, we demonstrate that the minimum inhibitory concentration of  
17 undissociated sorbic acid (MIC<sub>u</sub>) ranges between 4.2 and 21.2 mM when 34 *P. roqueforti*  
18 strains were grown on malt extract broth. A genome-wide association study revealed that the  
19 six most resistant strains contained the 180 kbp gene cluster SORBUS, which was absent in the  
20 other 28 strains. In addition, a SNP analysis revealed five genes outside the SORBUS cluster  
21 that may be linked to sorbic acid resistance. A partial SORBUS knock-out (>100 of 180 kbp) in  
22 a resistant strain reduced sorbic acid resistance to similar levels as observed in the sensitive  
23 strains. Whole genome transcriptome analysis revealed a small set of genes present in both  
24 resistant and sensitive *P. roqueforti* strains that were differentially expressed in the presence  
25 of the weak acid. These genes could explain why *P. roqueforti* is more resistant to sorbic acid  
26 when compared to other fungi, even in the absence of the SORBUS cluster. Together, the MIC<sub>u</sub>  
27 of 21.2 mM makes *P. roqueforti* among the most sorbic acid-resistant fungi, if not the most  
28 resistant fungus, which is mediated by the SORBUS gene cluster.

29

30 **Author summary**

31 Chemical preservatives, such as sorbic acid, are often used in food to prevent spoilage by fungi,  
32 yet some fungi are particularly well-suited to deal with these preservatives. First, we  
33 investigated the resistance of 34 *Penicillium roqueforti* strains to various food preservatives.  
34 This revealed that some strains were highly resistant to sorbic acid, while others are more  
35 sensitive. Next, we used DNA sequencing to compare the genetic variation between these  
36 strains and discovered a specific genetic region (SORBUS) that is unique to the resistant strains.  
37 Through comparative analysis with other fungal species the SORBUS region was studied in  
38 more detail and with the use of genetic engineering tools we removed this unique region.  
39 Finally, the mutant lacking the SORBUS region was confirmed to have lost its sorbic acid  
40 resistance. This finding is of particular interest as it suggests that only some, not all, *P.*  
41 *roqueforti* strains are potent spoilers and that specific genetic markers could help in the  
42 identification of resistant strains.

43

## 44 Introduction

45 Fungi are responsible for 5–10 % of all food spoilage [1] resulting in the production of off-  
46 flavors, discoloration and acidification [1,2]. Some species also produce mycotoxins, such as  
47 PR toxin and roquefortine C in the case of *Penicillium roqueforti* [3]. Toxins partially contribute  
48 to the high incidence of food-borne diseases affecting up to 30 % of the people in industrialized  
49 countries every year [4].

50 Food spoilage by filamentous fungi is believed to be mainly caused by spores that are  
51 spread through the air, water or other vectors like insects [5]. Preservation techniques such  
52 as pasteurization, fermentation, cooling or the addition of preservatives are used to reduce  
53 spoilage [6]. Some of the most applied preservatives are weak organic acids such as benzoic,  
54 propionic and sorbic acid. *Paecilomyces variotii*, *Penicillium paneum*, *Penicillium carneum* and  
55 *P. roqueforti* are among the few filamentous fungi capable of spoiling products containing  
56 weak acids, and are therefore called preservative-resistant moulds [7]. Weak-acid  
57 preservatives inhibit microbial growth, but their mode-of-action is not completely understood.  
58 According to the classical ‘weak-acid preservative theory’ the antimicrobial activity of weak  
59 acids is derived from their undissociated form that can pass the plasma membrane. These  
60 weak acids dissociate in the cytosol due to its neutral pH, and inhibit growth through  
61 acidification of the cytoplasm [8]. The inhibitory activity of sorbic acid at pH 6.5 and the  
62 correlation of sorbic acid resistance with ethanol tolerance in *Saccharomyces cerevisiae*  
63 suggest that this weak acid can also act as a membrane-active compound [8].

64 In *A. niger*, sorbic acid resistance is mediated by the phenylacrylic acid decarboxylase  
65 gene *padA*, and the putative 4-hydroxybenzoate decarboxylase gene, known as the cinnamic  
66 acid decarboxylase (*cdcA*) gene [9,10]. These genes encode proteins that catalyze the  
67 conversion of sorbic acid into 1,3-pentadiene. Genes *padA* and *cdcA* are regulated by the  
68 sorbic acid decarboxylase regulator (*SdrA*), which is a Zn2Cys6-finger transcription factor [10].  
69 These three genes are present on the same genetic locus in *A. niger* with *sdrA* being flanked  
70 by *cdcA* and *padA*. Orthologs of *cdcA* and *padA* are also clustered in *S. cerevisiae*, but this is  
71 not the case for the *sdrA* homologue [10,11]. Inactivation of *cdcA*, *padA* or *sdrA* results in  
72 reduced growth of *A. niger* on sorbic acid and cinnamic acid [9]. The fact that growth is not  
73 abolished and the fact that *padA* transcript levels are less affected than that of *cdcA* on sorbic  
74 acid upon deletion of *sdrA* suggests that an additional regulator is involved [9]. Indeed, the

75 weak-acid regulator WarA is also involved in sorbic acid resistance as well as other weak acids  
76 such as propionic and benzoic acid [12].

77 Weak-acid resistance in fungi is subject to intra- and inter-strain heterogeneity. Intra-  
78 strain heterogeneity has been observed in *Zygosaccharomyces bailii* with the existence of a  
79 small sub-population of cells that are more resistant (MIC = 7.6 mM) to sorbic acid than the  
80 sensitive population (MIC = 3 mM) [13], while inter-strain resistance has been observed in *P.*  
81 *roqueforti* with the existence of sorbic acid-resistant and sorbic acid-sensitive strains [14].  
82 Genome analysis of *P. roqueforti* strains have yielded clues about adaptive divergence in this  
83 species. Genomic islands with high identity are present in distant *Penicillium* species, while  
84 they are absent in closely related species, supporting the hypothesis of recent horizontal gene  
85 transfer events [15,16]. For instance, the presence of two large genomic regions, *Wallaby* and  
86 *CheesyTer* correlates with faster growth and functions relevant in a cheese matrix, respectively  
87 [16,17]. Noteworthy, the *CheesyTer* and *Wallaby* regions are only present in cheese isolates  
88 other than Roquefort, indicating that the Roquefort isolate population is potentially more  
89 closely related to the ‘ancestral’ *P. roqueforti* populations [18].

90 In this study, sorbic acid resistance of 34 *P. roqueforti* strains was assessed. A genome-  
91 wide association analysis revealed the presence of the 180 kbp gene cluster SORBUS in the six  
92 most resistant strains. A partial SORBUS knockout in such a strain showed a reduced sorbic  
93 acid resistance similar to that of the other 28 sensitive *P. roqueforti* strains.

94

## 95 **Results**

### 96 *Weak-acid sensitivity screening*

97 Weak-acid sensitivity of 34 *P. roqueforti* wild-type strains was assessed on MEA plates  
98 supplemented with 5 mM propionic, sorbic or benzoic acid, which corresponds to 4.42, 4.25  
99 and 3.07 mM undissociated acid, respectively. Three strains had been isolated from blue-  
100 veined cheeses such as Roquefort and the other 31 strains had been isolated from non-cheese  
101 environments (mostly related to spoiled food) (Table S1). The colony surface area was  
102 determined after five days of growth (Fig 1). The inhibitory effect of propionic acid at the  
103 tested concentration was limited for most strains, since 26 out of 34 strains grew to > 80 % of  
104 the colony surface area reached under control conditions. Strains DTO012A1 and DTO012A8  
105 even showed an increased colony size (up to 120 %) when compared to the control. The  
106 inhibitory effects of sorbic and benzoic acid were more pronounced. MEA supplemented with

107 potassium sorbate reduced colony area for all 34 *P. roqueforti* strains. The surface area under  
108 sorbic acid stress ranged from 0 to 80 % of the surface area reached under control conditions.  
109 Strains DTO006G1, DTO006G7, DTO013E5 and DTO013F2 showed the highest sorbic acid  
110 resistance, followed by DTO046C5. Benzoic acid was the most inhibitory compound, resulting  
111 in a maximum colony surface area between 0 and 20 % of the control. The most benzoic acid-  
112 resistant strains were DTO013F2 and DTO013E5. As these strains were also among the most  
113 sorbic acid-resistant strains, similar resistance mechanisms may be involved to cope with  
114 benzoic and sorbic acid stress.

115 Sorbic acid resistance was further analyzed by determining the MIC<sub>u</sub> values of sorbic  
116 acid for the 34 *P. roqueforti* strains. The four strains with the highest sorbic acid resistance on  
117 MEA (Fig 1), were also among the strains (DTO006G1, DTO006G7, DTO012A1, DTO012A8,  
118 DTO013E5 and DTO013F2) that showed the highest MIC<sub>u</sub> (Fig 2). DTO013E5 and DTO013F2  
119 were the most resistant even showing growth at the highest tested undissociated sorbate  
120 concentration of 21.2 mM, indicating a MIC<sub>u</sub> > 21.2 mM. The other strains showed a distinctly  
121 lower MIC<sub>u</sub>, ranging between 4.2 mM and 9.95 mM. Only strain DTO012A9 showed an  
122 intermediate resistance to sorbic acid with an average MIC<sub>u</sub> of 13.72 mM undissociated sorbic  
123 acid.

124

### 125 *Genome statistics and phylogeny*

126 The genomes of the 34 *P. roqueforti* strains were sequenced. Scaffold count varied between  
127 45 and 1358, assembly length between 26.53 and 31.74 Mb and GC content between 46.85  
128 and 48.44 % (Table 1). The number of predicted genes varied between 9633 and 10644, the  
129 number of genes with PFAM domains between 73.11 and 75.38 %, and the number of  
130 secondary metabolism gene clusters between 32 and 36. All strains had a BUSCO  
131 completeness of >99 %, indicating high quality assembly and gene predictions, except for  
132 DTO012A8 with a completeness of 94.83 %. This and the high scaffold count of the DTO012A8  
133 assembly (1358 scaffolds) indicates that its genome assembly is not complete. The strain was  
134 kept in the downstream analysis as most other metrics did not differ much compared to the  
135 other strains (Table 1). Figure 3 presents a phylogenetic tree of the 34 *P. roqueforti* strains  
136 based on 6923 single-copy orthologous genes. Three of the six sorbic acid-resistant strains  
137 (DTO012A2, DTO013F2, DTO013E5 and DTO012A8) are similar with DTO012A8 being closely

138 related to those strains. The two other resistant strains are also similar and more distantly  
139 related.

140

141 *Sorbic acid resistance correlates with a genomic cluster containing genes regulating sorbic acid*  
142 *decarboxylation*

143 The 34 *P. roqueforti* strains were divided into two groups based on their sorbic acid resistance,  
144 a group of six resistant (R-type) strains ('a', Fig 2) and a group of 28 sensitive (S-type) strains  
145 ('b-d', Fig 2). Whole genome comparison methods are often based on differences in variants  
146 (SNPs), however these methods do not reveal larger missing regions or genes between strains.  
147 Hence, a GWAS method was developed to compare whole-genome assemblies based on the  
148 MUMmer software. With this method 57 genes unique for the R-type group were identified,  
149 of which 51 were present on scaffold 43 of DTO006G7 (Table 2). In addition to the 51 unique  
150 genes in this scaffold, it contains 19 genes which are also found completely or in part in some  
151 of the S-type strains. The genomic alignment shows the genes on scaffold 43, which is present  
152 in the R-type strains (Fig 4). The first 80 kbp of scaffold 43 (protein IDs g12000-g12029) mainly  
153 contains hypothetical proteins without predicted function, while the remaining region  
154 between 80-180 kbp (g12030 – g12069) contains multiple regions homologous to genes  
155 previously reported as related to weak-acid resistance in *A. niger*. Predicted genes orthologous  
156 to *padA*, *cdcA* and *sdrA* of *A. niger* were found alongside each other (g12064-g12066) with  
157 respective identities (based on BLAST) of 87 %, 83 % and 53 %. Additional orthologs of *cdcA*,  
158 named *cdcB* (g12056) and *cdcC* (g12040) were identified on the same gene cluster as well,  
159 with identities of 72 % and 71%, respectively, when compared to *cdcA* of *A. niger*. Another  
160 locus (g2591) outside of this cluster also contains a protein homologous to *cdcA* (82 % identity)  
161 that is also present in the S-type strains. Similarly, two *padA* orthologs with high BLAST  
162 similarities to *padA* of *A. niger* (63 % and 58 %) were identified on the R-type specific cluster  
163 and named *padB* (g12032) and *padC* (g12057). In contrast, no homologs of *A. niger sdrA* and  
164 *padA* were found outside of the cluster, while 1 and 3 homologs were present inside cluster,  
165 respectively. In addition, a transcription factor (g2820 in DTO006G7) orthologous to *warA* was  
166 identified outside of the cluster in the genomes of all strains. These results indicate that the  
167 R-type strains contain a gene cluster similar to the sorbic acid resistance gene cluster described  
168 in *A. niger*, but considerably expanded [9,10]. For further reference, we name this cluster (i.e.,  
169 scaffold 43 of strain DTO006G7) SORBUS after the tree *Sorbus aucuparia* as sorbic acid has

170 been first isolated from its berries by August Hoffman [19,20]. While SORBUS as a whole is  
171 only present in the R-type strains (DTO006G1, DTO006G7, DTO012A2, DTO012A8, DTO013F2,  
172 DTO013E5), some S-type strains share up to 5 kbp parts of the sequence, especially in the first  
173 80 kbp of the cluster (Fig 4). It should be noted that the R-type strains were all isolated from  
174 non-cheese environments. Based on alignments of the sequencing reads to DTO006G7 we  
175 confirmed that out of 35 previously sequenced *P. roqueforti* strains [18], none of the 17 cheese  
176 strains contained the SORBUS cluster, while two out of the 18 non-cheese strains contained  
177 the SORBUS cluster (Table S1).

178 PLINK [21] was used to identify which SNPs correlate to sorbic acid resistance. This  
179 method allowed for the quantitative use of  $\log_{10}(\text{MIC}_{50})$  values as input for analysis, as opposed  
180 to the approach described above. The SNPs are visualized in a Manhattan plot (Fig 5). SNPs  
181 located on genes with a  $-\log_{10}(P) > 5$  and either a high or moderate impact (SNPeff) were  
182 selected (Table 3). This resulted in 338 SNPs in 41 genes. Out of these SNPs, 29 had a 'high'  
183 impact according to SNPeff and were located in 17 genes. Only six out of these 17 genes with  
184 high impact variants (g7017, g8100, g8106, g9942, g9943, g9976) were not located in the  
185 SORBUS cluster, the other 11 genes were either among the non-unique genes present on  
186 SORBUS, or genes of which less than 90 % of the sequence was found in S-type strains. With a  
187 BLAST analysis (protein-protein) and PFAM annotations the functions of the predicted  
188 proteins were assessed. This revealed that gene g8100 contains an ankyrin-repeat containing  
189 domain and gene g9943 is homologous to a zinc finger C3H1-type domain-containing protein,  
190 the putative function of the other three genes could not be assessed (hypothetical proteins).  
191 In all cases, the five genes showed high homology (> 99 %) to other *Penicillium* species. The  
192 PLINK analysis also revealed SNPs in two genes encoding proteins with a putative  
193 transmembrane transporter (g216) or cation transporter (g296) function.

194 To investigate the evolutionary origin of this cluster, presence of five PFAM domains  
195 (from g12060, g12061 and g12063-g12065) that are present on the SORBUS cluster was  
196 analysed in 32 Aspergilli and Penicillia as well as the 34 *P. roqueforti* strains (Table 4). These  
197 PFAM domains encode a putative GPR1/FUN34/yaaH family (g12060), a flavin reductase like  
198 domain (g12061), 3, 4-dihydroxy-2-butanone 4-phosphate synthase (g12063), a flavoprotein  
199 (g12064, *padA*) and a UbiD domain (g12065, *cdcA*). These domains are selected as they are  
200 clustered and because of their predicted role. The first domain has been associated with acetic  
201 acid sensitivity in *S. cerevisiae* [22], while the latter four domains are part of the gene cluster



202 described in *A. niger* [9]. Genes containing these domains were aligned using MAFFT and  
203 alignments were used to construct a phylogenetic tree per domain. Based on these  
204 phylogenetic trees the relatedness of the five genes of the SORBUS cluster was assessed. This  
205 revealed that the SORBUS genes g12061, g12064 and g12065 cluster more closely with several  
206 *Aspergillus* species (Table 4), whereas the PFAM domains from g12060 and g12063 did not  
207 cluster with any of the species included. In addition, the PFAMs present in the core genome  
208 (present both in S- and R-type strains) aligned more closely to *P. digitatum* or *P. oxalicum*.  
209 Furthermore, two genes with homology to transposase-like proteins (g12052 and g12055) and  
210 several reverse-transcriptase domains were identified in the SORBUS cluster.

211

### 212 *Genome-wide expression profiles of a sorbic acid-sensitive and sorbic acid-resistant strain*

213 A genome-wide expression profile was performed on a sorbic acid-sensitive strain (DTO377G3)  
214 and a sorbic acid-resistant strain (DTO006G7) grown on MEB in the presence or absence of 3  
215 mM sorbic acid. The sequence reads were aligned to the assemblies of these two *P. roqueforti*  
216 strains. Gene expression values were calculated and differentially expressed genes were  
217 identified (Table S4). The expression profiles of the biological replicates were similar,  
218 demonstrated by their clustering in the PCA plot (Fig 6). Combined, PC1 and PC2 explain 90 %  
219 of the variation observed. The samples treated with sorbic acid separate from the control  
220 samples on Y-axis while the differences between the strains are separated by on the X-axis.

221 Genes that are either up- or down-regulated in both the R-type and S-type strain when  
222 exposed to sorbic acid might be involved in a general response to sorbic acid stress in *P.*  
223 *roqueforti*. Venn diagrams were constructed revealing that 33 genes were significantly up-  
224 regulated in both the S-type and R-type strain (Fig 7A). An enrichment analysis revealed that  
225 the functional annotation terms 'secretion signal' and 'small secreted protein' are over-  
226 represented in these genes. Among the 21 shared down-regulated genes (Fig 7B) the NmrA-  
227 like family and NAD(P)H-binding domains were over-represented. Table S5 lists all genes  
228 present in both shared pools. The expression of the SORBUS genes (g12000-g12069) was  
229 analysed. This revealed that nine out of the 70 genes were significantly differentially expressed  
230 (Table 2), including two out of the three genes homologous to *cdcA* that were lower expressed  
231 ( $\log_2FC = -1.5$ ) in the presence of sorbic acid. On the SORBUS cluster g12061 (with a flavin-  
232 reductase like domain) was the highest expressed gene, reaching 2000 FPKM in the control  
233 condition.



234

### 235 *Partial knock-out confirms role of SORBUS in sorbic acid resistance*

236 Strains *P. roqueforti* DTO013F2 $\Delta$ *kusA* SC1 and SC2 were obtained lacking part of the SORBUS  
237 cluster. Nanopore sequencing was used to investigate how much of the SORBUS cluster was  
238 removed in these two transformants (Fig 8). This revealed that the deletions were larger than  
239 the 93 kbp region. A 105 and a 131 kbp part of the cluster was removed in DTO013F2  $\Delta$ *kusA*  
240 SC1 and SC2, respectively. Detailed analysis of the nanopore reads revealed that the smaller  
241 fragments within the SORBUS cluster present in SC1 and SC2 strains consisted of highly  
242 dissimilar sequences, indicating these are parts of repetitive DNA (Fig 8). Both SC strains had  
243 a reduced resistance to sorbic acid when compared to DTO013F2 and DTO013F2  $\Delta$ *kusA* with  
244 a MIC<sub>u</sub> similar to the S-type strain DTO377G3 (Fig 9). This shows that part of the SORBUS  
245 cluster is involved in sorbic acid stress mitigation.

246

### 247 **Discussion**

248 *P. roqueforti* is often encountered as a spoilage organism of food and feed. This can partly be  
249 attributed to its ability to grow at refrigeration temperatures [23], low O<sub>2</sub> levels [24] and/or  
250 its resistance to preservatives, such as sorbic acid [25]. The inhibitory effect of propionic,  
251 benzoic and sorbic acid on *P. roqueforti* growth was assessed and benzoic acid was found to  
252 have the strongest inhibitory effect on 34 *P. roqueforti* strains. Previous studies report that *P.*  
253 *roqueforti* is resistant to benzoic acid. Growth was observed up to levels of 3000 ppm sodium  
254 benzoate [26,27], while we observed growth at 610 ppm (5 mM). Propionic acid hardly  
255 affected the growth of *P. roqueforti*, which is not surprising since it has already been reported  
256 that this fungus germinates on potato dextrose agar containing 0.5 M propionic acid (pH 5.6)  
257 with an estimated MIC of 0.79 M [23]. The sorbic acid resistance of *P. roqueforti* has also been  
258 assessed previously [14,25–30], reporting MIC values ranging from 0 – 40 mM sorbic acid (i.e.  
259 a MIC<sub>u</sub> = 0 – 20 mM). This is similar to the range (MIC<sub>u</sub> = 4.2 – 21.3 mM) found in this study. In  
260 fact, a resistant and sensitive group (R- and S-types) consisting of six and 28 strains,  
261 respectively, were found in this study. S-type and R-type strains showed a resistance up to  
262 11.9 mM and 21.2 mM undissociated sorbic acid, respectively.

263 The R-type but not the S-type strains were found to contain a gene cluster (SORBUS)  
264 containing 70 genes, of which 51 genes are unique for the R-type strains. Even though the R-  
265 type strain DTO006G7 was used with the least fragmented Illumina assembly, the limits of the

266 SORBUS cluster could not be established based on these results alone. The Oxford Nanopore  
267 of the DTO013F2 *ΔkusA* assembly revealed that SORBUS is part of a 2.3 Mb contig. Genes  
268 homologous to sorbic acid degradation-associated genes in *A. niger* (*sdrA*, *cdcA*, *padA*, *warA*)  
269 were identified in the *P. roqueforti* genome [9,12]. A total of 1, 4, 3 and 1 orthologs were  
270 found, respectively, and only *warA* and one *cdcA* ortholog were not located on the SORBUS  
271 cluster. Two genes with putative transmembrane transport (g216) or cation transporter (g296)  
272 function were identified in the PLINK analysis. The encoded proteins might also be involved in  
273 sorbic acid stress mediation alongside the SORBUS cluster, because in addition to  
274 decarboxylation, sorbic acid stress could be mediated by an efflux pump or through removal  
275 of protons from the plasma membrane by H<sup>+</sup>-ATPase [12,31].

276 As mentioned, only six out of the 34 strains assessed in this study were found to contain  
277 the SORBUS cluster. This might be explained by the ecology of *P. roqueforti*. *P. roqueforti* is  
278 found in forest soil and wood, but is also associated with lactic acid bacteria (e.g. in silage).  
279 Frisvad & Samson [32] already speculated that these micro-organisms may have very well co-  
280 evolved, because all the metabolics produced by lactic acid bacteria (e.g. lactic and acetic acid,  
281 CO<sub>2</sub>) are tolerated by *P. roqueforti* [33]. The elevated levels of weak acids might act as selection  
282 pressure to maintain SORBUS in *P. roqueforti* strains which grow in this niche environment. In  
283 contrast, this selection pressure is not present in cheese which might explain that none of *P.*  
284 *roqueforti* strains in the 'cheese' population contain the SORBUS cluster [18]. It should be  
285 noted that the S-type sequence fragments that align with SORBUS mostly consists of proteins  
286 annotated as transposase-like proteins or reverse transcriptase, which might explain why  
287 these fragments are found in the S-type strains and it suggests that SORBUS has been obtained  
288 from a different species by horizontal gene transfer. This is supported by the phylogenetic  
289 analysis on PFAM domains of five SORBUS genes, as the results show that three out of the five  
290 SORBUS specific genes are more closely aligned to *Aspergillus* species than *Penicillium* species.  
291 The gene cluster SORBUS was also present in two of 35 previously sequenced *P. roqueforti*  
292 strains [18] and their sorbic acid resistance could be determined to validate the role of SORBUS  
293 in sorbic acid resistance.

294 Transcriptome analysis of the R-type *P. roqueforti* strain DTO006G7 revealed that two  
295 of the three *cdcA* paralogs (*cdcA* and *cdcC*) are significantly down-regulated during growth in  
296 the presence of sorbic acid. This is in contrast with the results previously described [9], where  
297 the authors found a > 500-fold change for *cdcA* when *A. niger* was cultivated on sorbic acid.

298 This difference might be caused by the difference in medium type, because that study [9] used  
299 sorbic acid as the sole carbon source, whereas in our experiments sorbic acid was used as a  
300 stressor in a nutrient-rich medium. This indicates that the sorbic acid content in the medium  
301 does not increase gene expression of the loci leading to increased resistance, suggesting that  
302 either these genes are constitutively expressed or expression is induced based on a different  
303 compound present in MEB.

304 Two partial SORBUS knockout strains in the DTO013F2  $\Delta kusA$  R-type strain showed  
305 reduced sorbic acid resistance to a level similar to that of the S-type strains. In contrast to the  
306 DTO013F2  $\Delta kusA$  strain, the SORBUS knockout strains were not repaired through homology  
307 directed repair using the donor DNA nor non-homologous end-joining. This might be due to  
308 the size of the fragment. Possibly, an alternative DNA repair mechanism such as  
309 microhomology-mediated end joining as described in *A. fumigatus* is employed in the  
310 DTO013F2  $\Delta kusA$  strain [34].

311 Despite the absence of a full SORBUS cluster in the S-type strains and the deletion strain, their  
312 MIC is still relatively high when compared to other fungal species such as *A. niger* (as shown  
313 in Fig 10) or *A. fumigatus* [12]. This suggests that along with the genes on the SORBUS cluster,  
314 other proteins are involved in sorbic acid stress mitigation. Our transcriptomics analysis  
315 revealed 21 down-regulated and 33 up-regulated genes that were similarly expressed both in  
316 a S-type and a R-type strain when exposed to sorbic acid. One of these up-regulated genes is  
317 the cation transporter (g1689, Table S4) which could have H<sup>+</sup> ATPase activity in the plasma  
318 membrane to counteract the acidification caused by the undissociated sorbic acid in the  
319 cytosol [31].

320 In conclusion, the results presented in this study demonstrate that weak-acid  
321 resistance varies between *P. roqueforti* strains and the SORBUS cluster contributes to a high  
322 sorbic acid resistance. Yet, even in the absence of this cluster the resistance is still relatively  
323 high, implying that other mechanisms are also involved in resistance to this weak acid.

324

## 325 **Methods**

### 326 *Strain and cultivation conditions*

327 All fungal strains (Table S1) were provided by the Westerdijk Fungal Biodiversity Institute.  
328 Conidia were harvested with a cotton swab after seven days of growth at 25 °C on malt extract  
329 agar (MEA, Oxoid, Hampshire, UK) and suspended in 10 mL ice-cold ACES buffer (10 mM N(2-  
330 acetamido)-2-aminoethanesulfonic acid, 0.02 % Tween 80, pH 6.8). The conidia suspension  
331 was passed through a syringe containing sterilized glass wool and washed twice with ACES  
332 buffer after centrifugation at 4 °C for 5 min at 2,500 *g*. The spore suspension was set to  $2 \cdot 10^8$   
333 spores mL<sup>-1</sup> using a Bürker-Türk haemocytometer (VWR, Amsterdam, The Netherlands) and  
334 kept on ice until further use.

335

### 336 *Weak acid growth assay*

337 Conidial suspension (5 µL) was inoculated in the centre of MEA plates containing 5 mM  
338 potassium sorbate, benzoic acid, or sodium propionate (all from Sigma). Medium was set at  
339 pH 4.0 using HCl, which corresponds to undissociated concentrations of 4.26, 3.07 and 4.42  
340 mM of these acids, respectively. The absence of preservative was used as a control. Cultures  
341 were photographed after 5 days and colony surface area was measured using a manual  
342 threshold in ImageJ.

343

### 344 *Sorbic acid resistance*

345 Conidial suspensions of the *P. roqueforti* strains were diluted to  $10^7$  spores mL<sup>-1</sup> and mixed in  
346 a 1:99 ratio with MEB pH 4.0 with and without 25 mM potassium sorbate. 300 µL of the  
347 resulting mixture was added in a well of a 96 wells plate (Greiner Bio-One, Cellstar 650180,  
348 [www.gbo.com](http://www.gbo.com)). Serial dilutions were made by mixing 225 µL MEB with potassium sorbate and  
349 75 µL MEB without potassium sorbate, resulting in wells with potassium sorbate  
350 concentrations of 25, 18.75, 14.06, 10.55, 7.91, 5.93, 4.45 and 0 mM. This corresponded to  
351 undissociated sorbic acid concentrations of 21.22, 15.92, 11.94, 8.95, 6.72, 5.04, 3.78 and 0  
352 mM, respectively. The undissociated sorbic acid concentrations were determined using the  
353 Henderson-Hasselbach equation.

354 The 96-wells plates were sealed with parafilm and incubated for 28 days at 25 °C using  
355 biologically independent replicates. After 28 days, growth was assessed and the undissociated  
356 minimal inhibitory concentration (MIC<sub>u</sub>) was determined for each strain. The MIC<sub>u</sub> was defined

357 as the lowest undissociated concentration in which no hyphal growth was observed. An one-  
358 way ANOVA followed by a Tukey's HSD test was used to test for significant differences in MIC<sub>u</sub>  
359 ( $P < 0.05$ ).

360

#### 361 *DNA extraction, genome sequencing, assembly and annotation*

362 DNA extraction was performed as described [35] and Illumina NextSeq500 2x150 bp paired-  
363 end technology was used for sequencing (Utrecht Sequencing Facility, useq.nl). The reads  
364 were trimmed on both ends when quality was lower than 15 using bbduk from the BBMap  
365 tool suite (BBmap version 37.88; <https://sourceforge.net/projects/bbmap/>). The trimmed  
366 reads were assembled with SPAdes v3.11.1 applying kmer lengths of 21, 33, 55, 77, 99 and  
367 127 and the –careful setting was used to reduce the number of indels and mismatches [36].  
368 Genes were predicted with Augustus version 3.0.3 [37] using the parameter set that was  
369 previously generated for *P. roqueforti* [35]. Functional annotation of the predicted genes was  
370 performed as described [38]. Repetitive sequences in the assembly were masked using  
371 RepeatMaker [39], RepBase library [40] and RepeatScout [41]. The Short Read Archive (SRA)  
372 numbers of the datasets in this study are listed in Table S1 under accession numbers. The  
373 genomes, gene predictions and functional annotations can be accessed interactively at  
374 <https://fungalgenomics.science.uu.nl>. [Available upon publication].

375

#### 376 *Genomic phylogeny and analysis*

377 Single-copy orthologous groups were identified and aligned using OrthoFinder v2.5.2 [42]. A  
378 maximum likelihood (ML) inference was performed using RAxML [43] under the  
379 PROTGAMMAAUTO model. The number of bootstraps used was 200 (Average WRF = 0.43 %) and  
380 *Penicillium rubens* Wisconsin 54-1255 [44] was used to root the tree. The phylogenetic  
381 tree was visualized using iTOL v5 [45].

382

#### 383 *Genome-wide association study*

384 A genome-wide association study (GWAS) was performed based on the sorbic acid resistance  
385 screening and the whole-genome sequences. First, *P. roqueforti* strains were grouped into a  
386 resistant (R-type) or sensitive (S-type) group. DTO006G7 was selected from the R-group as  
387 reference for the analysis, because the assembly of this strain was the least fragmented in this  
388 group. Next, the program nucmer from the MUMmer suite (<http://mummer.sourceforge.net/>,

389 version 4.0) was used to perform whole-genome alignment. Each genome was aligned to the  
390 reference and regions and genes unique for the R-type isolates were identified with the  
391 BEDtools package. The genome alignment was visualized with pyGenomeTracks [46]. A gene  
392 was considered absent when 90 % or more of its sequence was not found in the genome of a  
393 strain. The best practices recommended by GATK (Genome Analysis Toolkit) were used to  
394 obtain single nucleotide polymorphisms (SNPs) for each strain. In short, the sequence reads  
395 were aligned to the reference genome (DTO006G7) using Bowtie2 (version 2.2.9) and PCR  
396 duplicates were removed with Picard tools (MarkDuplicates; version 2.9.2). For variant calling,  
397 the HaplotypeCaller (GATK, version 3.7) was used with the following parameters: -  
398 stand\_call\_conf 30, -ploidy 1 and -ERC. The single-sample variant files (GVCFs) were joined  
399 into a GenomicsDB before joint genotyping. The variants were annotated using SNPEff  
400 (version 4.3) based on their predicted biological effect, such as the introduction of an early  
401 stop-codon or a synonymous annotation. The number of SNPs and their putative impact ('low',  
402 'moderate' or 'high', as defined by SNPEff) was listed for each gene per genome. The SNPs  
403 were then correlated to sorbic acid resistance using PLINK v1.9 [21] with parameters '-maf 0.5  
404 -allow-extra-chr'. The resulting association files were analysed and visualized using R.

405

#### 406 *RNA extraction and sequencing*

407 A genome-wide transcriptome analysis was performed on the sorbic acid sensitive *P.*  
408 *roqueforti* strain DTO377G3 and the sorbic acid-resistant *P. roqueforti* strain DTO006G7.  
409 Erlenmeyer flasks containing 50 mL MEB (pH 4.0) were inoculated with 100 µl ACES containing  
410 10<sup>7</sup> conidia and incubated for 48 h at 25 °C and 200 rpm. Mycelium was harvested using a  
411 sterilized miracloth filter and equally divided in Erlenmeyer flasks with 50 mL MEB (pH 4.0) or  
412 50 mL MEB containing 3 mM potassium sorbate (pH 4.0). Growth was continued for another  
413 four hours, after which the mycelium was harvested using a sterilized Miracloth filter and  
414 frozen in liquid nitrogen. Total RNA was isolated with the RNeasy Plant Mini Kit (Qiagen) and  
415 purified by on-column DNase digestion according to the manufacturer's protocol. RNA was  
416 sequenced with Illumina NextSeq2000 2x50 bp paired-end technology (Utrecht Sequencing  
417 Facility; useq.nl). The transfer experiment and subsequent RNA-sequencing was performed in  
418 biological triplicates. The transcript lengths, counts per gene and read mapping were  
419 determined using Salmon v1.5.2 with --validateMappings [47]. The transcript abundance of  
420 reads was quantified using custom constructed indices for DTO006G7 and DTO377G3.



421 DESeq2 [48] was used for pairwise comparisons of the samples and the identification  
422 of differentially expressed genes. Genes with low read counts (<10) were excluded from the  
423 analysis and a gene was considered differentially expressed when the adjusted p-value was <  
424 0.05. In addition, genes were considered up- or down-regulated when they had a log<sub>2</sub> fold  
425 change of > 2 or < -2, respectively. A Fisher Exact test as implemented in PyRanges [49] was  
426 employed to identify over- and under-representation of functional annotation terms in sets of  
427 genes. To correct for multiple testing the False Discovery Rate method was used, with a P-  
428 value < 0.05 as cut off.

429 The sequence reads are available in the Short Read Archive under BioProject  
430 PRJNA796729 [available upon publication].

431

#### 432 *Plasmid construction and generation knockout strain*

433 A *kusA* deficient DTO013F2 strain was constructed using the protocol and plasmid pPT22.4 as  
434 described [50]. Deletion was confirmed through diagnostic PCR and nanopore sequencing (Fig  
435 S1). CRISPR/Cas9 technology was employed to remove a 93 kbp region (from 84 to 177 kbp)  
436 of the SORBUS cluster in DTO013F2  $\Delta kusA$ . Two single-guide RNAs (sgRNAs) were designed to  
437 perform a simultaneous double restriction in the 93 kbp SORBUS region. Transformation  
438 procedures were performed as described, with some modifications [50]. In short, plasmid  
439 pFC332 [51] was used as a vector to express the sgRNA, *cas9* and a hygromycin selection  
440 marker (for primer sequences used in this study see Table S2). The 5' and 3' flanking regions  
441 of sgRNA were amplified using plasmids pTLL108.1 and pTLL109.2 as template [52]. The  
442 amplified products were fused and introduced into pFC332 using Gibson assembly (NEBuilder  
443 HiFi DNA Assembly Master Mix, New England Biolabs, MA, USA). The vectors containing the  
444 sgRNA were then transformed into competent *Escherichia coli* TOP10 cells for multiplication  
445 overnight. Plasmids were recovered using Quick Plasmid Miniprep Kit (ThermoFisher,  
446 Waltham, MA, USA) and digested using SacII to verify the presence of the sgRNA. In addition,  
447 the correct integration of the sgRNA was confirmed with sequencing. To construct donor DNA,  
448 two 1 kbp homologous regions located at scaffold 43 at nucleotide position 83573 to 84629  
449 and 177760 to 178854 were amplified and fused using a unique 23 nucleotide sequence  
450 GGAGTGGTACCAATATAAGCCGG with a PAM site for further genetic engineering.

451 Transformation was performed as described with adjustments [53]. In short, *P.*  
452 *roqueforti* conidia were incubated 48 h at 25 °C in 100 mL potato dextrose broth at 200 rpm.



453 The mycelium was washed in SMC and incubated for 4 h at 37 °C in lysing enzymes from  
454 *Trichoderma harzianum* (Sigma) dissolved in SMC. Protoplasts were resuspended in 1 mL STC  
455 and kept on ice after centrifuging for 5 min at 3000 g. To 100 µL of this suspension, 2 µg donor  
456 DNA, 2 µg of each pFC332 vector containing sgRNA (pTF and pSdrA) and 1.025 mL of freshly  
457 made PEG solution was added (see Table S3 for the vectors used in this study). After 5 min, 2  
458 mL STC was added and the protoplasts were mixed with 20 mL liquid MMS containing 0.3 %  
459 agar and 200 µg hygromycin mL<sup>-1</sup> (InvivoGen, San Diego, CA, USA). The mixture was poured  
460 on MMS containing 0.6 % agar and 200 µg hygromycin mL<sup>-1</sup>. Transformants were grown for 7-  
461 14 days at 25 °C and then single streaked on MM containing 100 µg mL<sup>-1</sup> hygromycin until  
462 sporulating colonies appeared. Next, the plasmid was removed by a single streak on MM  
463 plates without antibiotic. Finally, transformants were single streaked on MM, MM containing  
464 100 µg hygromycin mL<sup>-1</sup> and MEA plates to confirm that transformants lost the plasmids.

465 To verify the transformants, genomic DNA from DTO013F2  $\Delta kusA$  and two DTO013F2  
466  $\Delta kusA \Delta SORBUS$  strains was sequenced with Oxford Nanopore MinION technology (FLO-  
467 MIN106) at the Utrecht Sequencing Facility (useq.nl). The reads were assembled using Canu  
468 v2.2 using the option for raw nanopore data and guided by a genome size of 28 Mbp [54]. In  
469 addition, the nanopore reads were aligned to the DTO006G7 assembly using Minimap2 [55].  
470 Only reads aligning once and that had a mapping quality > 60 were selected using samtools.  
471 The sequencing data generated with the MinION technology is deposited in the SRA archive  
472 under the following accession numbers: SRR17178875, SRR17178876 and SRR17178877.

473

#### 474 **Acknowledgements**

475 We thank Utrecht Sequencing Facility (useq.nl) for providing sequencing service and data.  
476 Utrecht Sequencing Facility is subsidized by the University Medical Center Utrecht, Hubrecht  
477 Institute, Utrecht University and The Netherlands X-omics Initiative (NWO project  
478 184.034.019).

479

## 480 Figure captions & Tables

481

### 482 **Fig 1. Weak-acid screening shows variable resistances to multiple acids.**

483 Average colony size (cm<sup>2</sup>) of 34 *P. roqueforti* strains after five days of growth on MEA (pH 4.0)  
484 (grey) or MEA (pH 4.0) supplemented with 5 mM propionic acid (orange), sorbic acid (blue) or  
485 benzoic acid (green). Strains DTO006G1, DTO006G7, DTO013E5 and DTO013F2 are relatively  
486 resistant to sorbic acid. Error bars indicate standard deviation of biologically independent  
487 replicates.

488

### 489 **Fig 2. Sorbic acid resistance screening reveals 6 resistant *P. roqueforti* strains.**

490 Average undissociated MIC<sub>u</sub> values of sorbic acid of 34 *P. roqueforti* strains (mM ± standard  
491 deviation). Each bar graph represents biological triplicates. Error bars indicate standard  
492 deviation and letters indicate significant difference in MIC<sub>u</sub> (p < 0.05).

493

### 494 **Fig 3. Phylogeny of the *P. roqueforti* strains.**

495 Phylogenetic tree of the 34 *P. roqueforti* strains used in this study. Sorbic acid resistance (MIC<sub>u</sub>)  
496 is indicated in blue-yellow shading. The tree is based on 6923 single-copy orthologous genes  
497 and was constructed using RAxML. *P. rubens* [44] was used as outgroup. Bootstrap values <100  
498 are indicated. Strains containing the SORBUS cluster are highlighted in blue.

499

### 500 **Fig 4. Genome comparison reveals unique gene cluster in R-type strains.**

501 Genomic alignment of 33 *P. roqueforti* strains to the SORBUS cluster (scaffold 43 of  
502 DTO006G7). Predicted genes are indicated with arrows, repetitive DNA is indicated in red, the  
503 sequence read coverage is indicated in the green tracks, and blue bars indicate (partial)  
504 overlap with DTO006G7. The complete SORBUS cluster is only present in the R-type strains  
505 (DTO006G1, DTO006G7, DTO012A2, DTO012A8, DTO013F2 and DTO013E5).

506

### 507 **Fig 5. Manhattan plot shows SNPs associated with sorbic acid resistance.**

508 Scaffolds are listed on the x-axis, while the y-axis display the significance of the association  
509 (-log<sub>10</sub>(p-value)). Yellow, orange and red dots indicate 'low', 'moderate' or 'high' impact SNPs  
510 as determined by SNPeff, respectively. The GeneIDs associated with the SNPs with a -log<sub>10</sub>(p-  
511 value) > 7.5 are indicated. The SORBUS cluster is located between the dashed lines.

512

513 **Fig 6. Principle component analysis demonstrates clustering of sorbic acid-exposed strains.**

514 Each dot represents a biological replicate. PC1 and PC2 together describe 90% of the variation.

515 The sample grown on sorbic acid separate on the Y-axis and the two strains are separated on  
516 the X-axis.

517

518 **Fig 7. Venn diagram of differentially expressed genes in the presence of sorbic acid.** Up- (A)

519 or down-regulated (B) in R-type DTO006G7 and S-type DTO377G3 when exposed to sorbic acid

520 compared to the control in the absence of this weak acid. Genes were considered up- or down-

521 regulated when the  $\log_2FC > 2$ ,  $p\text{-value} < 0.05$  and  $FPKM > 10$ .

522

523 **Fig 8. Schematic overview of SORBUS sequences of the knockouts strains.**

524 Strains DTO006G7, DTO013F2 and knock-out strains DTO013F2  $\Delta kusA$ , SC1 and SC2 are

525 depicted. Predicted genes are indicated with arrows, repetitive DNA is indicated in red, the

526 sequence read coverage is indicated in the green tracks, and blue bars indicate (partial)

527 overlap with DTO006G7. The orange bar indicates the targeted knock-out region (target),

528 flanked by the 5' and 3' ends (in blue). Dotted lines and scissors indicate the loci targeted by

529 the sgRNAs.

530

531 **Fig 9. Sorbic acid resistance of five *P. roqueforti* strains and *A. niger* N402.**

532 The average  $MIC_u$  (mM  $\pm$  standard deviation) is given for the fungal strains. Each bar graph

533 represents average value of biological independent triplicates. Error bars indicate standard

534 deviation and letters indicate significant difference in  $MIC_u$  ( $p < 0.05$ ).

535 **Table 1.** Genome assembly and annotation statistics. The number of scaffolds, assembly  
 536 length, GC content and genes of the 34 sequenced *P. roqueforti* strains are listed. In addition,  
 537 the number of genes with a PFAM domain, the number of secondary metabolism gene clusters  
 538 and the BUSCO completeness are listed. The type column indicates if the strain is sorbic acid-  
 539 resistant (R) or sorbic acid-sensitive (S).

| Strain   | Assembly  |                             | Annotation              |       |                     | Annotation quality                |                         | Type |
|----------|-----------|-----------------------------|-------------------------|-------|---------------------|-----------------------------------|-------------------------|------|
|          | Scaffolds | Total assembly length (Mbp) | Assembly GC content (%) | Genes | Genes with PFAM (%) | Secondary metabolism gene cluster | BUSCO2 completeness (%) | R/S  |
| DT000216 | 134       | 29.48                       | 47.75                   | 10135 | 7539 (74.39%)       | 33                                | 99.66%                  | S    |
| DT0003C3 | 353       | 30.28                       | 47.82                   | 10362 | 7612 (73.46%)       | 36                                | 99.66%                  | S    |
| DT0003H1 | 382       | 30.29                       | 47.82                   | 10349 | 7607 (73.5%)        | 36                                | 99.66%                  | S    |
| DT0006G1 | 109       | 27.97                       | 48.18                   | 9975  | 7468 (74.87%)       | 33                                | 99.66%                  | R    |
| DT0006G7 | 100       | 27.97                       | 48.18                   | 9982  | 7471 (74.84%)       | 33                                | 99.66%                  | R    |
| DT0012A1 | 158       | 29.37                       | 48.11                   | 10280 | 7557 (73.51%)       | 33                                | 100%                    | R    |
| DT0012A2 | 73        | 27.07                       | 48.26                   | 9786  | 7362 (75.23%)       | 33                                | 99.66%                  | S    |
| DT0012A6 | 93        | 27.29                       | 48.32                   | 9817  | 7376 (75.13%)       | 33                                | 99.66%                  | S    |
| DT0012A7 | 62        | 27.33                       | 48.07                   | 9748  | 7335 (75.25%)       | 34                                | 99.66%                  | S    |
| DT0012A8 | 1358      | 29.6                        | 47.88                   | 10253 | 7483 (72.98%)       | 32                                | 94.83%                  | R    |
| DT0012A9 | 581       | 29.84                       | 47.89                   | 10341 | 7613 (73.62%)       | 34                                | 99.31%                  | S    |
| DT0013E5 | 165       | 29.27                       | 48.11                   | 10252 | 7537 (73.52%)       | 33                                | 100%                    | R    |
| DT0013F2 | 657       | 31.74                       | 47.49                   | 10644 | 7739 (72.71%)       | 33                                | 100%                    | R    |
| DT0013F5 | 304       | 29.56                       | 48.04                   | 10313 | 7591 (73.61%)       | 35                                | 99.66%                  | S    |
| DT002716 | 177       | 29.3                        | 48.12                   | 10325 | 7560 (73.22%)       | 32                                | 99.66%                  | S    |
| DT0032C6 | 141       | 28.45                       | 48.13                   | 10008 | 7441 (74.35%)       | 33                                | 100%                    | S    |
| DT0039G3 | 45        | 27.22                       | 48.14                   | 9764  | 7352 (75.3%)        | 32                                | 99.66%                  | S    |
| DT0046C5 | 143       | 28.8                        | 48.15                   | 10098 | 7488 (74.15%)       | 33                                | 99.66%                  | S    |
| DT0070G2 | 60        | 26.75                       | 48.39                   | 9724  | 7324 (75.32%)       | 33                                | 100%                    | S    |
| DT0081F9 | 47        | 27.24                       | 48.13                   | 9760  | 7349 (75.3%)        | 32                                | 99.66%                  | S    |
| DT0101D6 | 141       | 28.96                       | 48.07                   | 10109 | 7497 (74.16%)       | 33                                | 99.31%                  | S    |
| DT010219 | 186       | 28.53                       | 47.92                   | 9978  | 7439 (74.55%)       | 32                                | 99.66%                  | S    |
| DT0126G2 | 174       | 28.06                       | 48.02                   | 9939  | 7431 (74.77%)       | 33                                | 99.31%                  | S    |

|          |        |       |       |         |               |    |        |   |
|----------|--------|-------|-------|---------|---------------|----|--------|---|
| DTO127F7 | 59     | 26.54 | 48.43 | 9639    | 7315 (75.89%) | 35 | 99.66% | S |
| DTO127F9 | 54     | 26.53 | 48.44 | 9633    | 7311 (75.9%)  | 36 | 99.66% | S |
| DTO130C1 | 537    | 30.48 | 47.79 | 10375   | 7612 (73.37%) | 36 | 99.66% | S |
| DTO163C3 | 239    | 30    | 48.16 | 10485   | 7653 (72.99%) | 33 | 99.66% | S |
| DTO163F5 | 284    | 30.9  | 46.85 | 10010   | 7441 (74.34%) | 33 | 100%   | S |
| DTO163G4 | 104    | 28.45 | 48.12 | 10006   | 7441 (74.37%) | 33 | 100%   | S |
| DTO265D5 | 66     | 26.76 | 48.44 | 9751    | 7350 (75.38%) | 33 | 100%   | S |
| DTO369A1 | 156    | 28.29 | 47.97 | 9945    | 7437 (74.78%) | 32 | 99.66% | S |
| DTO375B1 | 62     | 27.2  | 48.2  | 9804    | 7378 (75.25%) | 33 | 99.31% | S |
| DTO377G2 | 101    | 28.07 | 48.14 | 9962    | 7444 (74.72%) | 33 | 99.31% | S |
| DTO377G3 | 84     | 26.97 | 48.24 | 9762    | 7335 (75.14%) | 33 | 99.66% | S |
|          |        |       |       | <hr/>   |               |    |        |   |
| Average  | 217.32 | 28.55 | 48.05 | 10038.6 |               |    |        |   |
| Min      | 45     | 26.53 | 46.85 | 9633    |               |    |        |   |
| Max      | 1358   | 31.74 | 48.44 | 10644   |               |    |        |   |

541 **Table 2.** Genes (DT0006G7) located on the SORBUS cluster. Fold change ( $\log_2FC$ ) of the sorbic  
 542 acid samples compared to the control is given. Numbers in bold are significantly differently  
 543 expressed (adjusted p-value < 0.05) and the mean expression (FPKM) of three biological  
 544 replicates is given per condition (control and sorbic acid). Rows highlighted in grey indicate  
 545 genes that are not unique for the R-type strains.

| Geneld | Name | Functional annotation<br>(PFAM or description) | Expression (FPKM) |                | $\log_2FC$  | p-value<br>(Adj.) |
|--------|------|------------------------------------------------|-------------------|----------------|-------------|-------------------|
|        |      |                                                | Contro<br>I       | Sorbic<br>acid |             |                   |
| 12000  |      | FAM167                                         | 4                 | 8              | 0.69        | 0.66              |
| 12001  |      | hypothetical protein                           | 16                | 86             | <b>2.18</b> | <b>0.00</b>       |
| 12002  |      | NEMP                                           | 2                 | 2              | -0.27       | 0.89              |
| 12003  |      | BTB/POZ domain                                 | 16                | 23             | 0.48        | 0.35              |
| 12004  |      | hypothetical protein                           | 59                | 40             | -0.56       | 0.16              |
| 12005  |      | hypothetical protein                           | 0                 | 0              | 1.05        | 0.59              |
| 12006  |      | Reverse transcriptase                          | 0                 | 0              | -           | -                 |
| 12007  |      | DUF3723                                        | 0                 | 0              | -           | -                 |
| 12008  |      | hypothetical protein                           | 0                 | 0              | -           | -                 |
| 12009  |      | Hly-III related protein                        | 0                 | 0              | -           | -                 |
| 12010  |      | Cyclin like F-box                              | 1                 | 1              | 0.72        | 0.32              |
| 12011  |      | Cyclin like F-box                              | 17                | 24             | 0.47        | 0.25              |
| 12012  |      | Reverse transcriptase                          | 3                 | 7              | <b>1.02</b> | <b>0.03</b>       |
| 12013  |      | Endonuclease/Exonuclease/phosphatase<br>family | 1                 | 4              | <b>1.40</b> | <b>0.00</b>       |
| 12014  |      | Probable transposable element                  | 1                 | 3              | 0.83        | 0.51              |
| 12015  |      | Aldo/keto reductase family                     | 463               | 365            | -0.34       | 0.36              |
| 12016  |      | Reverse transcriptase                          | 26                | 20             | -0.35       | 0.57              |
| 12017  |      | Telomere-associated recq-like helicase         | 13                | 15             | 0.23        | 0.57              |
| 12018  |      | Cyclin like F-box                              | 29                | 25             | -0.23       | 0.41              |
| 12019  |      | hypothetical protein                           | 0                 | 0              | -1.04       | 0.83              |
| 12020  |      | hypothetical protein                           | 1                 | 1              | 0.22        | 0.96              |
| 12021  |      | Centrosomin N-terminal motif 1                 | 0                 | 0              | 2.51        | 0.24              |
| 12022  |      | hypothetical protein                           | 3                 | 7              | 1.02        | 0.09              |
| 12023  |      | Cytochrome C mitochondrial import<br>factor    | 1                 | 0              | -0.84       | 0.73              |

|       |             |                                            |     |     |              |             |
|-------|-------------|--------------------------------------------|-----|-----|--------------|-------------|
| 12024 |             | hypothetical protein                       | 8   | 10  | 0.21         | 0.86        |
| 12025 |             | hypothetical protein                       | 5   | 6   | 0.25         | 0.60        |
| 12026 |             | Winged helix-turn helix                    | 0   | 0   | -            | -           |
| 12027 |             | hypothetical protein                       | 15  | 10  | -0.57        | 0.23        |
| 12028 |             | Pronucleotidyl transferase                 | 0   | 0   | -0.14        | 0.95        |
| 12029 |             | Pronucleotidyl transferase                 | 1   | 0   | -0.83        | 0.64        |
| 12030 |             | hypothetical protein                       | 11  | 15  | 0.42         | 0.58        |
| 12031 |             | hypothetical protein                       | 0   | 0   | -            | -           |
| 12032 | <i>padB</i> | Flavoprotein                               | 450 | 288 | -0.62        | 0.15        |
| 12033 |             | PHF5-like protein                          | 3   | 3   | 0.11         | 0.91        |
| 12034 |             | Pyridoxamine 5'-phosphate oxidase          | 370 | 287 | -0.36        | 0.48        |
| 12035 |             | Mitochondrial carrier protein              | 11  | 12  | 0.06         | 0.96        |
| 12036 |             | Mitochondrial carrier protein              | 12  | 17  | 0.42         | 0.65        |
| 12037 |             | GTP cyclohydrolase II                      | 10  | 2   | <b>-1.86</b> | <b>0.01</b> |
| 12038 |             | Potassium channel tetramerisation domain   | 26  | 30  | 0.18         | 0.82        |
| 12039 |             | hypothetical protein                       | 17  | 10  | -0.58        | 0.58        |
| 12040 | <i>cdcC</i> | UbiD                                       | 134 | 65  | <b>-1.02</b> | <b>0.01</b> |
| 12041 |             | Pyridoxamine 5'-phosphate oxidase          | 2   | 1   | -0.54        | 0.90        |
| 12042 |             | hypothetical protein                       | 9   | 11  | 0.27         | 0.76        |
| 12043 |             | GTP cyclohydrolase II                      | 5   | 1   | <b>-1.63</b> | <b>0.03</b> |
| 12044 |             | GPR1/FUN34/yaaH family                     | 47  | 9   | <b>-2.05</b> | <b>0.00</b> |
| 12045 |             | Mitochondrial carrier protein              | 1   | 1   | -0.61        | 0.73        |
| 12046 |             | hypothetical protein                       | 12  | 12  | -0.03        | 0.97        |
| 12047 |             | Helix-turn-helix domain/endonuclease       | 8   | 8   | 0.03         | 0.95        |
| 12048 |             | Flavonol reductase/cinnamoyl-CoA reductase | 53  | 56  | 0.07         | 0.93        |
| 12049 |             | Flavonol reductase/cinnamoyl-CoA reductase | 9   | 8   | -0.26        | 0.63        |
| 12050 |             | Tannase                                    | 427 | 352 | -0.27        | 0.55        |
| 12051 |             | hypothetical protein                       | 0   | 1   | 1.76         |             |
| 12052 |             | Transposase-like protein                   | 6   | 7   | 0.13         | 0.84        |
| 12053 |             | Reverse transcriptase                      | 0   | 0   | 0.31         | 0.89        |
| 12054 |             | Zinc finger transcription factor           | 26  | 13  | -0.98        | 0.07        |
| 12055 |             | Transposase-like protein                   | 0   | 0   | 1.64         |             |
| 12056 | <i>cdcB</i> | UbiD                                       | 211 | 142 | -0.51        | 0.65        |



|       |             |                                                |      |      |              |             |
|-------|-------------|------------------------------------------------|------|------|--------------|-------------|
| 12057 | <i>padC</i> | Flavoprotein                                   | 78   | 75   | -0.07        | 0.90        |
| 12058 |             | Pyridoxamine 5'-phosphate oxidase like         | 348  | 504  | 0.50         | 0.28        |
| 12059 |             | GTP cyclohydrolase II                          | 25   | 24   | -0.04        | 0.96        |
| 12060 |             | GPR1/FUN34/yaaH family                         | 3    | 3    | -0.39        | 0.67        |
| 12061 |             | Flavin reductase like domain                   | 2028 | 1532 | -0.40        | 0.42        |
| 12062 |             | hypothetical protein                           | 272  | 295  | 0.08         | 0.86        |
| 12063 |             | 3, 4-dihydroxy-2-butanone 4-phosphate synthase | 65   | 34   | -0.85        | 0.25        |
| 12064 | <i>padA</i> | Flavoprotein                                   | 92   | 45   | -0.97        | 0.08        |
| 12065 | <i>cdcA</i> | UbiD                                           | 65   | 22   | <b>-1.53</b> | <b>0.00</b> |
| 12066 | <i>sdrA</i> | Hypothetical transcription factor              | 2    | 1    | -0.76        | 0.71        |
| 12067 |             | hypothetical protein                           | 0    | 0    |              |             |
| 12068 |             | NACHT domain                                   | 4    | 8    | 0.85         | 0.09        |
| 12069 |             | Histone H3                                     | 3    | 6    | <b>0.95</b>  | <b>0.00</b> |

547 **Table 3.** Genes (DT0006G7) containing SNPs associated with sorbic acid resistance. Only SNPs  
 548 with a  $-\log_{10}(\text{p-value}) > 5$  and a moderate or high impact as determined by SNPeff are listed.  
 549 Grey shading indicates overlap with sequence repeats.

| GeneID | SNP impact |      | Effect                                  | PFAM annotation                             |
|--------|------------|------|-----------------------------------------|---------------------------------------------|
|        | Moderate   | High |                                         |                                             |
| g103   | 1          | 0    |                                         | hypothetical protein                        |
| g216   | 1          | 0    |                                         | ABC transporter transmembrane region        |
| g235   | 1          | 0    |                                         | STAG domain                                 |
| g296   | 5          | 0    |                                         | Cation transporter/ATPase, N-terminus       |
| g312   | 1          | 0    |                                         | Probable molybdopterin binding domain       |
| g313   | 1          | 0    |                                         | DDHD domain                                 |
| g314   | 1          | 0    |                                         | hypothetical protein                        |
| g315   | 1          | 0    |                                         | FAD binding domain                          |
| g7015  | 1          | 1    | Stop lost & splice region variant       | hypothetical protein                        |
| g8100  | 0          | 1    | Stop gained                             | Ankyrin repeats (3 copies)                  |
| g8101  | 3          | 0    |                                         | DDE superfamily endonuclease                |
| g8104  | 7          | 0    |                                         | hypothetical protein                        |
| g8105  | 10         | 0    |                                         | hypothetical protein                        |
| g8106  | 3          | 1    | Stop gained                             | hypothetical protein                        |
| g8107  | 26         | 0    |                                         | Ankyrin repeats (3 copies)                  |
| g12002 | 2          | 0    |                                         | NEMP                                        |
| g12005 | 9          | 1    | Frameshift variant                      | hypothetical protein                        |
| g12006 | 42         | 2    | Frameshift variant & Stop gained        | Reverse transcriptase                       |
| g12007 | 8          | 0    |                                         | Protein of unknown function (DUF3723)       |
| g12013 | 48         | 3    | Frameshift variants                     | Endonuclease/Exonuclease/phosphatase family |
| g12014 | 8          | 1    | Stop lost & splice region variant       | Probable transposable element               |
| g12016 | 2          | 0    |                                         | Reverse transcriptase                       |
| g12019 | 11         | 0    |                                         | hypothetical protein                        |
| g12025 | 9          | 1    | Stop gained                             | hypothetical protein                        |
| g12028 | 18         | 1    | Stop lost & splice region variant       | Pronucleotidyl transferase                  |
| g12029 | 26         | 6    | Stop gained, Stop lost & splice variant | Pronucleotidyl transferase                  |
| g12030 | 16         | 2    | Frameshift variant & Stop lost          | hypothetical protein                        |

|              |            |           |                                |                                                                 |
|--------------|------------|-----------|--------------------------------|-----------------------------------------------------------------|
| g12046       | 1          | 0         |                                | hypothetical protein                                            |
| g12052       | 4          | 1         | Stop gained                    | Transposase-like protein                                        |
| g12053       | 1          | 0         |                                | Reverse transcriptase                                           |
| g12054       | 4          | 0         |                                | hypothetical protein                                            |
| g12055       | 6          | 2         | Frameshift variant & Stop lost | Transposase-like protein                                        |
| g12069       | 7          | 1         | Frameshift variant             | Histone H3                                                      |
| g9749        | 7          | 0         |                                | hypothetical protein                                            |
| g9942        | 1          | 2         | Stop gained                    | hypothetical protein                                            |
| g9943        | 2          | 2         | Stop gained                    | AAA domain                                                      |
| g9944        | 8          | 0         |                                | hypothetical protein                                            |
| g9945        | 4          | 0         |                                | ATPase family associated with various cellular activities (AAA) |
| g9961        | 1          | 0         |                                | hypothetical protein                                            |
| g9966        | 2          | 0         |                                | Endonuclease-reverse transcriptase                              |
| g9976        | 0          | 1         | Start lost                     | hypothetical protein                                            |
| <b>TOTAL</b> | <b>309</b> | <b>29</b> |                                |                                                                 |

551 **Table 4.** Number of genes containing PFAM domains corresponding to g12060, g12061 and  
 552 g12063-g12065 (PF01184, PF01613, PF00926, PF02441, PF01977) based on phylogenetic trees  
 553 constructed with their respective PFAM domains. Top six strains are R-type *P. roqueforti*  
 554 strains containing the SORBUS cluster. C (CORE) indicates if the domains aligned closely to the  
 555 PFAMs not unique for the SORBUS cluster or did not align to *P. roqueforti*, S (SORBUS) indicates  
 556 the number of PFAM domains which aligned closely to PFAMs originated from SORBUS.

| Strain   | g12060  |   | g12061  |   | g12063  |   | g12064  |   | g12065  |   |
|----------|---------|---|---------|---|---------|---|---------|---|---------|---|
|          | PF01184 |   | PF01613 |   | PF00926 |   | PF02441 |   | PF01977 |   |
|          | C       | S | C       | S | C       | S | C       | S | C       | S |
| DT0013F2 | 7       | 1 | 4       | 1 | 1       | 1 | 5       | 3 | 2       | 3 |
| DT0013E5 | 7       | 1 | 3       | 1 | 1       | 1 | 5       | 3 | 2       | 3 |
| DT0012A8 | 7       | 1 | 3       | 1 | 1       | 1 | 5       | 3 | 2       | 3 |
| DT0012A1 | 7       | 1 | 3       | 1 | 1       | 1 | 5       | 3 | 2       | 3 |
| DT0006G7 | 7       | 1 | 4       | 1 | 1       | 1 | 5       | 3 | 2       | 3 |
| DT0006G1 | 7       | 1 | 4       | 1 | 1       | 1 | 5       | 3 | 2       | 3 |
| DT0377G3 | 7       | 0 | 4       | 0 | 1       | 0 | 5       | 0 | 2       | 0 |
| DT0377G2 | 7       | 0 | 4       | 0 | 1       | 0 | 5       | 0 | 2       | 0 |
| DT0375B1 | 7       | 0 | 3       | 0 | 1       | 0 | 5       | 0 | 2       | 0 |
| DT0369A1 | 7       | 0 | 4       | 0 | 1       | 0 | 5       | 0 | 2       | 0 |
| DT0265D5 | 7       | 0 | 3       | 0 | 1       | 0 | 5       | 0 | 2       | 0 |
| DT0163G4 | 7       | 0 | 3       | 0 | 1       | 0 | 5       | 0 | 2       | 0 |
| DT0163F5 | 7       | 0 | 3       | 0 | 1       | 0 | 5       | 0 | 2       | 0 |
| DT0163C3 | 7       | 0 | 4       | 0 | 1       | 0 | 5       | 0 | 2       | 0 |
| DT0130C1 | 7       | 0 | 3       | 0 | 1       | 0 | 5       | 0 | 2       | 0 |
| DT0127F9 | 7       | 0 | 3       | 0 | 1       | 0 | 5       | 0 | 2       | 0 |
| DT0127F7 | 7       | 0 | 3       | 0 | 1       | 0 | 5       | 0 | 2       | 0 |
| DT0126G2 | 7       | 0 | 4       | 0 | 1       | 0 | 5       | 0 | 2       | 0 |
| DT0102I9 | 7       | 0 | 4       | 0 | 1       | 0 | 5       | 0 | 2       | 0 |
| DT0101D6 | 7       | 0 | 3       | 0 | 1       | 0 | 5       | 0 | 2       | 0 |
| DT0081F9 | 7       | 0 | 4       | 0 | 1       | 0 | 5       | 0 | 2       | 0 |
| DT0070G2 | 7       | 0 | 3       | 0 | 1       | 0 | 5       | 0 | 2       | 0 |
| DT0046C5 | 7       | 0 | 3       | 0 | 1       | 0 | 5       | 0 | 2       | 0 |
| DT0039G3 | 7       | 0 | 4       | 0 | 1       | 0 | 5       | 0 | 2       | 0 |
| DT0032C6 | 7       | 0 | 3       | 0 | 1       | 0 | 5       | 0 | 2       | 0 |
| DT0027I6 | 7       | 0 | 4       | 0 | 1       | 0 | 5       | 0 | 2       | 0 |
| DT0013F5 | 7       | 0 | 4       | 0 | 1       | 0 | 5       | 0 | 2       | 0 |

|                                                    |   |   |   |   |   |   |   |   |   |   |
|----------------------------------------------------|---|---|---|---|---|---|---|---|---|---|
| DT0012A9                                           | 7 | 0 | 3 | 0 | 1 | 0 | 5 | 0 | 2 | 0 |
| DT0012A7                                           | 7 | 0 | 3 | 0 | 1 | 0 | 5 | 0 | 2 | 0 |
| DT0012A6                                           | 7 | 0 | 3 | 0 | 1 | 0 | 5 | 0 | 2 | 0 |
| DT0012A2                                           | 7 | 0 | 3 | 0 | 1 | 0 | 5 | 0 | 2 | 0 |
| DT0003H1                                           | 7 | 0 | 3 | 0 | 1 | 0 | 5 | 0 | 2 | 0 |
| DT0003C3                                           | 7 | 0 | 3 | 0 | 1 | 0 | 5 | 0 | 2 | 0 |
| DT0002I6                                           | 7 | 0 | 3 | 0 | 1 | 0 | 5 | 0 | 2 | 0 |
| <i>Penicillium roqueforti</i> FM164                | 8 | 0 | 3 | 0 | 1 | 0 | 5 | 0 | 2 | 0 |
| <i>Penicillium oxalicum</i>                        | 4 | 0 | 2 | 0 | 1 | 0 | 2 | 0 | 0 | 0 |
| <i>Penicillium digitatum</i>                       | 1 | 0 | 2 | 0 | 1 | 0 | 4 | 0 | 1 | 0 |
| <i>Paecilomyces variotii</i>                       | 8 | 0 | 6 | 0 | 1 | 0 | 4 | 1 | 2 | 0 |
| <i>Paecilomyces variotii</i> DTO217A2              | 7 | 0 | 7 | 0 | 1 | 0 | 5 | 1 | 3 | 0 |
| <i>Paecilomyces niveus</i>                         | 9 | 0 | 8 | 0 | 1 | 0 | 5 | 1 | 2 | 0 |
| <i>Aspergillus wentii</i>                          | 4 | 0 | 5 | 0 | 1 | 0 | 4 | 1 | 2 | 0 |
| <i>Aspergillus violaceofuscus</i>                  | 4 | 0 | 5 | 1 | 1 | 0 | 4 | 0 | 2 | 0 |
| <i>Aspergillus vadensis</i>                        | 3 | 0 | 5 | 0 | 1 | 0 | 4 | 1 | 2 | 1 |
| <i>Aspergillus uvarum</i>                          | 4 | 0 | 5 | 1 | 1 | 0 | 3 | 0 | 2 | 0 |
| <i>Aspergillus tubingensis</i>                     | 3 | 0 | 6 | 0 | 1 | 0 | 4 | 0 | 2 | 1 |
| <i>Aspergillus sclerotiicarbonarius</i>            | 3 | 0 | 5 | 1 | 1 | 0 | 4 | 1 | 2 | 0 |
| <i>Aspergillus sclerotioniger</i>                  | 3 | 0 | 4 | 1 | 1 | 0 | 3 | 0 | 1 | 0 |
| <i>Aspergillus piperis</i>                         | 3 | 0 | 5 | 0 | 1 | 0 | 4 | 1 | 2 | 0 |
| <i>Aspergillus aureofulgens</i>                    | 3 | 0 | 5 | 0 | 1 | 0 | 4 | 1 | 2 | 0 |
| <i>Aspergillus niger</i> N402                      | 3 | 0 | 7 | 0 | 1 | 0 | 5 | 1 | 3 | 0 |
| <i>Aspergillus niger</i> ATCC 1015                 | 3 | 0 | 7 | 0 | 1 | 0 | 5 | 1 | 3 | 0 |
| <i>Aspergillus neoniger</i>                        | 4 | 0 | 5 | 0 | 1 | 0 | 4 | 1 | 2 | 1 |
| <i>Aspergillus niger</i> ( <i>lacticoffeatus</i> ) | 3 | 0 | 5 | 0 | 1 | 0 | 4 | 1 | 2 | 0 |
| <i>Aspergillus japonicus</i>                       | 4 | 0 | 5 | 1 | 1 | 0 | 4 | 0 | 3 | 0 |
| <i>Aspergillus indologenus</i>                     | 4 | 0 | 5 | 1 | 1 | 0 | 4 | 0 | 2 | 0 |
| <i>Aspergillus ibericus</i>                        | 3 | 0 | 5 | 1 | 1 | 0 | 4 | 1 | 1 | 0 |
| <i>Aspergillus heteromorphus</i>                   | 3 | 0 | 5 | 0 | 1 | 0 | 3 | 1 | 2 | 0 |
| <i>Aspergillus fumigatus</i>                       | 3 | 0 | 3 | 0 | 1 | 0 | 2 | 0 | 0 | 0 |
| <i>Aspergillus flavus</i>                          | 5 | 0 | 4 | 0 | 1 | 0 | 4 | 0 | 2 | 0 |
| <i>Aspergillus fijiensis</i>                       | 4 | 0 | 5 | 1 | 1 | 0 | 4 | 1 | 4 | 0 |
| <i>Aspergillus eucalypticola</i>                   | 3 | 0 | 5 | 0 | 1 | 0 | 4 | 1 | 2 | 1 |
| <i>Aspergillus ellipticus</i>                      | 3 | 0 | 5 | 0 | 1 | 0 | 6 | 2 | 7 | 0 |
| <i>Aspergillus costaricaensis</i>                  | 4 | 0 | 5 | 0 | 1 | 0 | 4 | 0 | 2 | 1 |
| <i>Aspergillus brunneovolaceus</i>                 | 4 | 0 | 6 | 1 | 1 | 0 | 4 | 1 | 4 | 0 |
| <i>Aspergillus aculeatinus</i>                     | 4 | 0 | 5 | 1 | 1 | 0 | 4 | 0 | 3 | 0 |

*Arthroderma benhamiae*

|   |   |   |   |   |   |   |   |   |   |
|---|---|---|---|---|---|---|---|---|---|
| 2 | 0 | 1 | 0 | 0 | 1 | 2 | 0 | 0 | 0 |
|---|---|---|---|---|---|---|---|---|---|

557

558  
559  
560  
561  
562  
563  
564  
565  
566  
567  
568  
569  
570  
571  
572  
573  
574  
575  
576  
577  
578  
579  
580  
581  
582  
583  
584  
585  
586  
587  
588  
589  
590  
591  
592  
593  
594  
595  
596  
597  
598  
599  
600

## References

1. Pitt JI, Hocking AD. Fungi and food spoilage. Fungi and Food Spoilage. Springer; 2009. doi:10.1007/978-0-387-92207-2
2. Filtenborg O, Frisvad JC, Thrane U. Moulds in food spoilage. Int J Food Microbiol. 1996;33: 85–102. doi:10.1016/0168-1605(96)01153-1
3. Gillot G, Jany JL, Poirier E, Maillard MB, Debaets S, Thierry A, et al. Functional diversity within the *Penicillium roqueforti* species. Int J Food Microbiol. 2017;241: 141–150. doi:10.1016/j.ijfoodmicro.2016.10.001
4. Bondi M, Messi P, Halami PM, Papadopoulou C, De Niederhausern S. Emerging microbial concerns in food safety and new control measures. Biomed Res Int. 2014;2014: 1–3. doi:10.1155/2014/251512
5. Dijksterhuis J. Fungal spores: Highly variable and stress-resistant vehicles for distribution and spoilage. Food Microbiol. 2019;81: 2–11. doi:10.1016/j.fm.2018.11.006
6. Kaczmarek M, Avery S V., Singleton I. Microbes associated with fresh produce: Sources, types and methods to reduce spoilage and contamination. Adv Appl Microbiol. 2019;107: 29–82. doi:10.1016/bs.aambs.2019.02.001
7. Rico-Munoz E, Samson RA, Houbraken J. Mould spoilage of foods and beverages: Using the right methodology. Food Microbiol. 2019;81: 51–62. doi:10.1016/j.fm.2018.03.016
8. Stratford M, Anslow PA. Evidence that sorbic acid does not inhibit yeast as a classic “weak acid preservative.” Lett Appl Microbiol. 1998;27: 203–206. doi:10.1046/j.1472-765X.1998.00424.x
9. Lubbers RJM, Dilokpimol A, Navarro J, Peng M, Wang M, Lipzen A, et al. Cinnamic Acid and Sorbic acid Conversion Are Mediated by the Same Transcriptional Regulator in *Aspergillus niger*. Front Bioeng Biotechnol. 2019;7: 249. doi:10.3389/fbioe.2019.00249
10. Plumridge A, Melin P, Stratford M, Novodvorska M, Shunburne L, Dyer PS, et al. The decarboxylation of the weak-acid preservative, sorbic acid, is encoded by linked genes in *Aspergillus spp*. Fungal Genet Biol. 2010;47: 683–692. doi:10.1016/j.fgb.2010.04.011
11. Mukai N, Masaki K, Fujii T, Kawamukai M, Iefuji H. PAD1 and FDC1 are essential for the decarboxylation of phenylacrylic acids in *Saccharomyces cerevisiae*. J Biosci Bioeng. 2010;109: 564–569. doi:10.1016/j.jbiosc.2009.11.011
12. Geoghegan IA, Stratford M, Bromley M, Archer DB, Avery S V. Weak acid resistance a (WarA), a novel transcription factor required for regulation of weak-acid resistance and spore-spore heterogeneity in *Aspergillus niger*. mSphere. 2020;5: 1–39. doi:10.1101/788141
13. Stratford M, Steels H, Nebe-von-Caron G, Novodvorska M, Hayer K, Archer DB. Extreme resistance to weak-acid preservatives in the spoilage yeast *Zygosaccharomyces bailii*. Int J Food Microbiol. 2013;166: 126–134. doi:10.1016/j.ijfoodmicro.2013.06.025
14. Liewen MB, Marth EH. Viability and ATP content of conidia of sorbic acid-sensitive and-resistant strains of *Penicillium roqueforti* after exposure to sorbic acid. Appl Microbiol Biotechnol. 1985;21: 113–117. doi:10.1007/BF00252372
15. Ropars J, López-Villavicencio M, Dupont J, Snirc A, Gillot G, Coton M, et al. Induction of sexual reproduction and genetic diversity in the cheese fungus *Penicillium roqueforti*. Evol Appl. 2014;7: 433–441. doi:10.1111/eva.12140
16. Ropars J, Rodríguez De La Vega RC, López-Villavicencio M, Gouzy J, Sallet E, Dumas É, et al. Adaptive horizontal gene transfers between multiple cheese-associated fungi. Curr Biol. 2015;25: 2562–2569. doi:10.1016/j.cub.2015.08.025



- 601 17. Cheeseman K, Ropars J, Renault P, Dupont J, Gouzy J, Branca A, et al. Multiple recent horizontal  
602 transfers of a large genomic region in cheese making fungi. *Nat Commun.* 2014;5.  
603 doi:10.1038/ncomms3876
- 604 18. Dumas E, Feurtey A, Rodríguez de la Vega RC, Le Prieur S, Snirc A, Coton M, et al. Independent  
605 domestication events in the blue-cheese fungus *Penicillium roqueforti*. *Mol Ecol.* 2020;29: 2639–2660.  
606 doi:10.1111/mec.15359
- 607 19. Naidu AS. *Natural Food Antimicrobial Systems*. Natural Food Antimicrobial Systems. CRC press; 2000.  
608 doi:10.1201/9781420039368
- 609 20. Nielsen P V., Rios R. Inhibition of fungal growth on bread by volatile components from spices and herbs,  
610 and the possible application in active packaging, with special emphasis on mustard essential oil. *Int J*  
611 *Food Microbiol.* 2000;60: 219–229. doi:10.1016/S0168-1605(00)00343-3
- 612 21. Purcell S, Neale B, Todd-Brown K, Thomas L, Ferreira MAR, Bender D, et al. PLINK: A tool set for whole-  
613 genome association and population-based linkage analyses. *Am J Hum Genet.* 2007;81: 559–575.  
614 doi:10.1086/519795
- 615 22. Paiva S, Devaux F, Barbosa S, Jacq C, Casal M. Ady2p is essential for the acetate permease activity in the  
616 yeast *Saccharomyces cerevisiae*. *Yeast.* 2004;21: 201–210. doi:10.1002/yea.1056
- 617 23. Kalai S, Anzala L, Bensoussan M, Dantigny P. Modelling the effect of temperature, pH, water activity,  
618 and organic acids on the germination time of *Penicillium camemberti* and *Penicillium roqueforti* conidia.  
619 *Int J Food Microbiol.* 2017;240: 124–130. doi:10.1016/j.ijfoodmicro.2016.03.024
- 620 24. Nguyen Van Long N, Vasseur V, Couvert O, Coroller L, Burlot M, Rigalma K, et al. Modeling the effect of  
621 modified atmospheres on conidial germination of fungi from dairy foods. *Front Microbiol.* 2017;8: 2109.  
622 doi:10.3389/fmicb.2017.02109
- 623 25. Quattrini M, Liang N, Fortina MG, Xiang S, Curtis JM, Gänzle M. Exploiting synergies of sourdough and  
624 antifungal organic acids to delay fungal spoilage of bread. *Int J Food Microbiol.* 2019;302: 8–14.  
625 doi:10.1016/j.ijfoodmicro.2018.09.007
- 626 26. Suhr KI, Nielsen P V. Effect of weak acid preservatives on growth of bakery product spoilage fungi at  
627 different water activities and pH values. *Int J Food Microbiol.* 2004;95: 67–78.  
628 doi:10.1016/j.ijfoodmicro.2004.02.004
- 629 27. Blaszyk M, Blank G, Holley R, Chong J. Reduced water activity during sporogenesis in selected penicillia:  
630 Impact on spore quality. *Food Res Int.* 1998;31: 503–509. doi:10.1016/S0963-9969(99)00019-8
- 631 28. Huang Y, Wilson M, Chapman B, Hocking AD. Evaluation of the efficacy of four weak acids as antifungal  
632 preservatives in low-acid intermediate moisture model food systems. *Food Microbiol.* 2010;27: 33–36.  
633 doi:10.1016/j.fm.2009.07.017
- 634 29. Razavi-Rohani SM, Griffiths MW. Antifungal effects of sorbic acid and propionic acid at different pH and  
635 NaCl conditions. *J Food Saf.* 1999;19: 109–120. doi:10.1111/j.1745-4565.1999.tb00238.x
- 636 30. Bullerman LB. Effects of potassium sorbate on growth and ochratoxin production by *Aspergillus*  
637 *ochraceus* and *Penicillium* species. *J Food Prot.* 1985;48: 162–165. doi:10.4315/0362-028X-48.2.162
- 638 31. Lambert RJ, Stratford M. Weak-acid preservatives: Modelling microbial inhibition and response. *J Appl*  
639 *Microbiol.* 1999;86: 157–164. doi:10.1046/j.1365-2672.1999.00646.x
- 640 32. Samson RA, Hoekstra ES, Frisvad JC. *Introduction to food-and airborne fungi*. Centraalbureau voor  
641 Schimmelcultures (CBS); 2004.
- 642 33. Broberg A, Jacobsson K, Ström K, Schnürer J. Metabolite profiles of lactic acid bacteria in grass silage.  
643 *Appl Environ Microbiol.* 2007;73: 5547–5552. doi:10.1128/AEM.02939-06

- 644 34. Zhang C, Meng X, Wei X, Lu L. Highly efficient CRISPR mutagenesis by microhomology-mediated end  
645 joining in *Aspergillus fumigatus*. Fungal Genet Biol. 2016;86: 47–57. doi:10.1016/j.fgb.2015.12.007
- 646 35. Punt M, van den Brule T, Teertstra WR, Dijksterhuis J, den Besten HMW, Ohm RA, et al. Impact of  
647 maturation and growth temperature on cell-size distribution, heat-resistance, compatible solute  
648 composition and transcription profiles of *Penicillium roqueforti* conidia. Food Res Int. 2020;136:  
649 109287. doi:10.1016/j.foodres.2020.109287
- 650 36. Bankevich A, Nurk S, Antipov D, Gurevich AA, Dvorkin M, Kulikov AS, et al. SPAdes: A new genome  
651 assembly algorithm and its applications to single-cell sequencing. J Comput Biol. 2012;19: 455–477.  
652 doi:10.1089/cmb.2012.0021
- 653 37. Stanke M, Schöffmann O, Morgenstern B, Waack S. Gene prediction in eukaryotes with a generalized  
654 hidden Markov model that uses hints from external sources. BMC Bioinformatics. 2006;7: 1–11.  
655 doi:10.1186/1471-2105-7-62
- 656 38. De Bekker C, Ohm RA, Evans HC, Brachmann A, Hughes DP. Ant-infecting *Ophiocordyceps* genomes  
657 reveal a high diversity of potential behavioral manipulation genes and a possible major role for  
658 enterotoxins. Sci Rep. 2017;7: 1–13. doi:10.1038/s41598-017-12863-w
- 659 39. Smit AFA. Repeat-Masker Open-3.0. [http://www repeatmasker org](http://www.repeatmasker.org). 2010.
- 660 40. Bao W, Kojima KK, Kohany O. Repbase Update, a database of repetitive elements in eukaryotic  
661 genomes. Mob DNA. 2015;6: 462–467. doi:10.1186/s13100-015-0041-9
- 662 41. Price AL, Jones NC, Pevzner PA. De novo identification of repeat families in large genomes.  
663 Bioinformatics. 2005;21: i351–i358. doi:10.1093/bioinformatics/bti1018
- 664 42. Emms DM, Kelly S. OrthoFinder: Phylogenetic orthology inference for comparative genomics. Genome  
665 Biol. 2019;20: 1–14. doi:10.1186/s13059-019-1832-y
- 666 43. Stamatakis A. RAxML version 8: A tool for phylogenetic analysis and post-analysis of large phylogenies.  
667 Bioinformatics. 2014;30: 1312–1313. doi:10.1093/bioinformatics/btu033
- 668 44. Van den Berg MA, Albang R, Albermann K, Badger JH, Daran JM, M Driessen AJ, et al. Genome  
669 sequencing and analysis of the filamentous fungus *Penicillium chrysogenum*. Nat Biotechnol. 2008;26:  
670 1161–1168. doi:10.1038/nbt.1498
- 671 45. Letunic I, Bork P. Interactive Tree Of Life (iTOL) v5: an online tool for phylogenetic tree display and  
672 annotation. Nucleic Acids Res. 2021; 1–4. doi:10.1093/nar/gkab301
- 673 46. Lopez-Delisle L, Rabbani L, Wolff J, Bhardwaj V, Backofen R, Grüning B, et al. pyGenomeTracks:  
674 reproducible plots for multivariate genomic datasets. Bioinformatics. 2021;37: 422–423.  
675 doi:10.1093/bioinformatics/btaa692
- 676 47. Patro R, Duggal G, Love MI, Irizarry RA, Kingsford C. Salmon provides fast and bias-aware quantification  
677 of transcript expression. Nat Methods. 2017;14: 417–419. doi:10.1038/nmeth.4197
- 678 48. Love MI, Huber W, Anders S. Moderated estimation of fold change and dispersion for RNA-seq data  
679 with DESeq2. Genome Biol. 2014;15: 1–21.
- 680 49. Stovner EB, Sætrum P. PyRanges: efficient comparison of genomic intervals in Python. Bioinformatics.  
681 2020;36: 918–919.
- 682 50. Seekles SJ, Teunisse PPP, Punt M, van den Brule T, Dijksterhuis J, Houbraken J, et al. Preservation stress  
683 resistance of melanin deficient conidia from *Paecilomyces variotii* and *Penicillium roqueforti* mutants  
684 generated via CRISPR/Cas9 genome editing. Fungal Biol Biotechnol. 2021;8: 1–13. doi:10.1186/s40694-  
685 021-00111-w
- 686 51. Nødvig CS, Nielsen JB, Kogle ME, Mortensen UH. A CRISPR-Cas9 system for genetic engineering of

- 687 filamentous fungi. PLoS One. 2015/07/16. 2015;10: 1–18. doi:10.1371/journal.pone.0133085
- 688 52. Van Leeuwe TM, Arentshorst M, Ernst T, Alazi E, Punt PJ, Ram AFJ. Efficient marker free CRISPR/Cas9  
689 genome editing for functional analysis of gene families in filamentous fungi. Fungal Biol Biotechnol.  
690 2019;6: 1–13. doi:10.1186/s40694-019-0076-7
- 691 53. Arentshorst M, Ram AFJ, Meyer V. Using non-homologous end-joining-deficient strains for functional  
692 gene analyses in filamentous fungi. In: Bolton M, Thomma B, editors. Plant Fungal Pathogens. Humana  
693 Press; 2012. pp. 133–150. doi:[https://doi.org/10.1007/978-1-61779-501-5\\_9](https://doi.org/10.1007/978-1-61779-501-5_9)
- 694 54. Koren S, Walenz BP, Berlin K, Miller JR, Bergman NH, Phillippy AM. Canu: Scalable and accurate long-  
695 read assembly via adaptive  $\kappa$ -mer weighting and repeat separation. Genome Res. 2017;27: 722–736.  
696 doi:10.1101/gr.215087.116
- 697 55. Li H. Minimap2: Pairwise alignment for nucleotide sequences. Bioinformatics. 2018;34: 3094–3100.  
698 doi:10.1093/bioinformatics/bty191
- 699

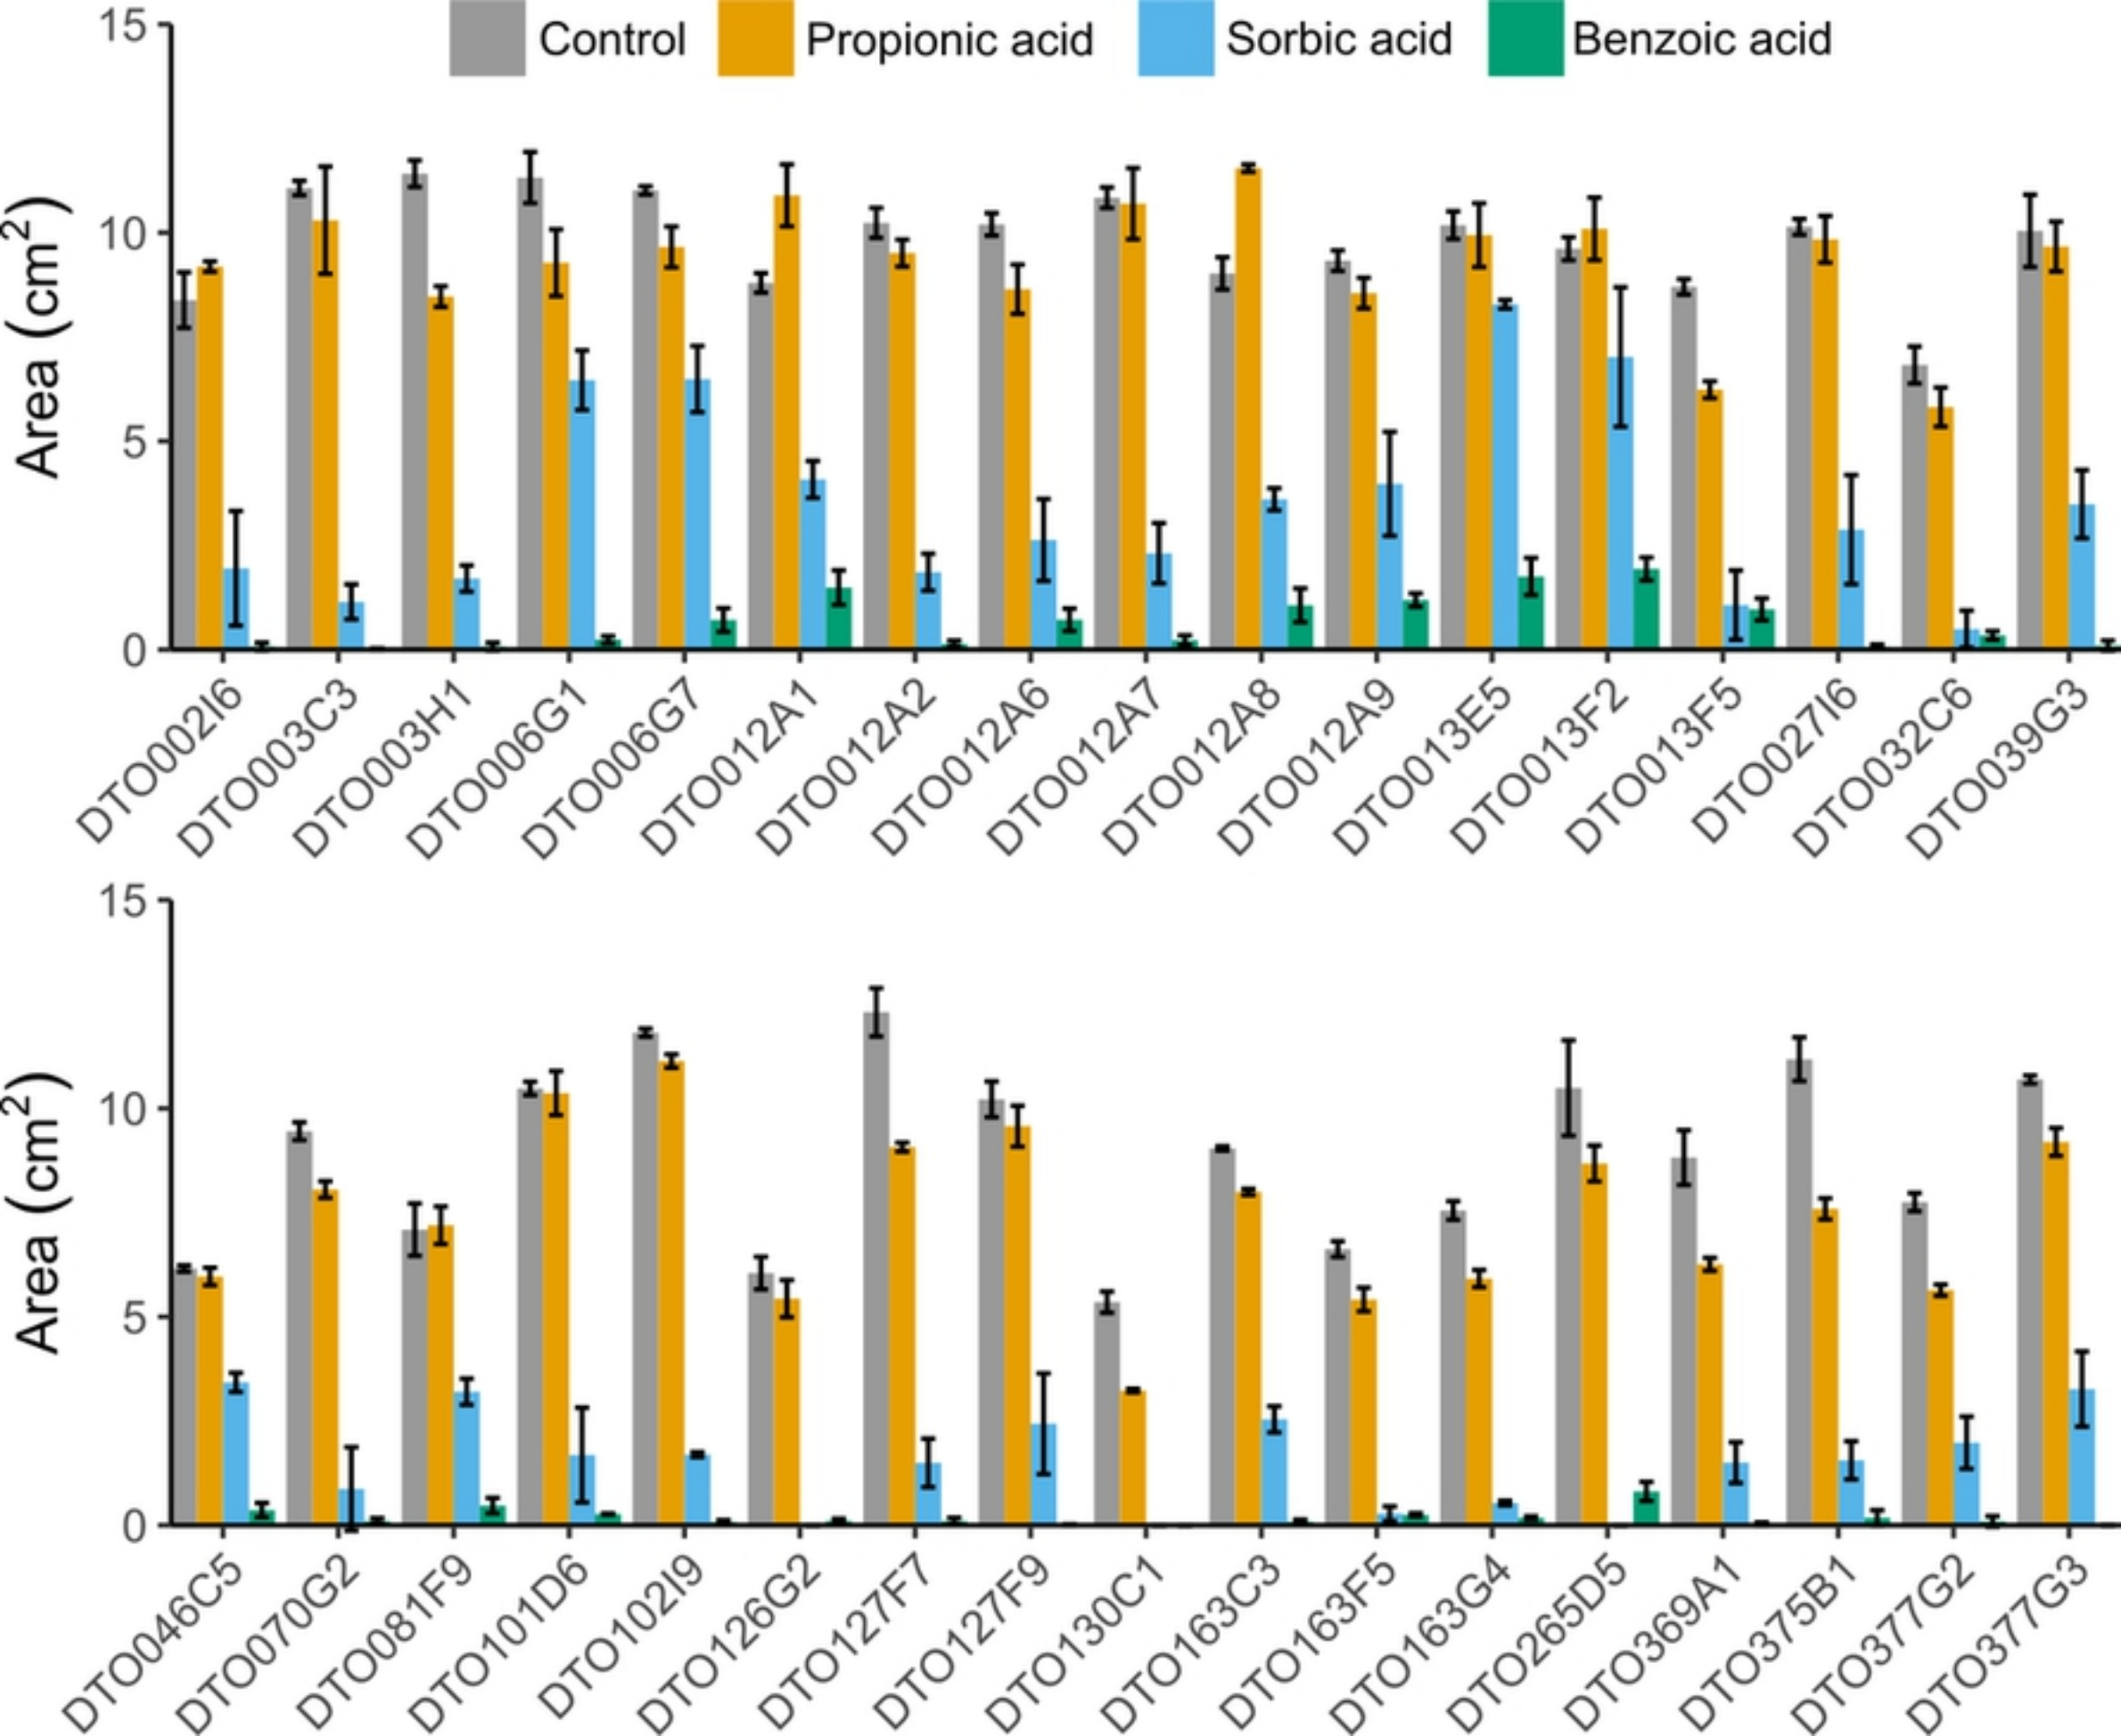

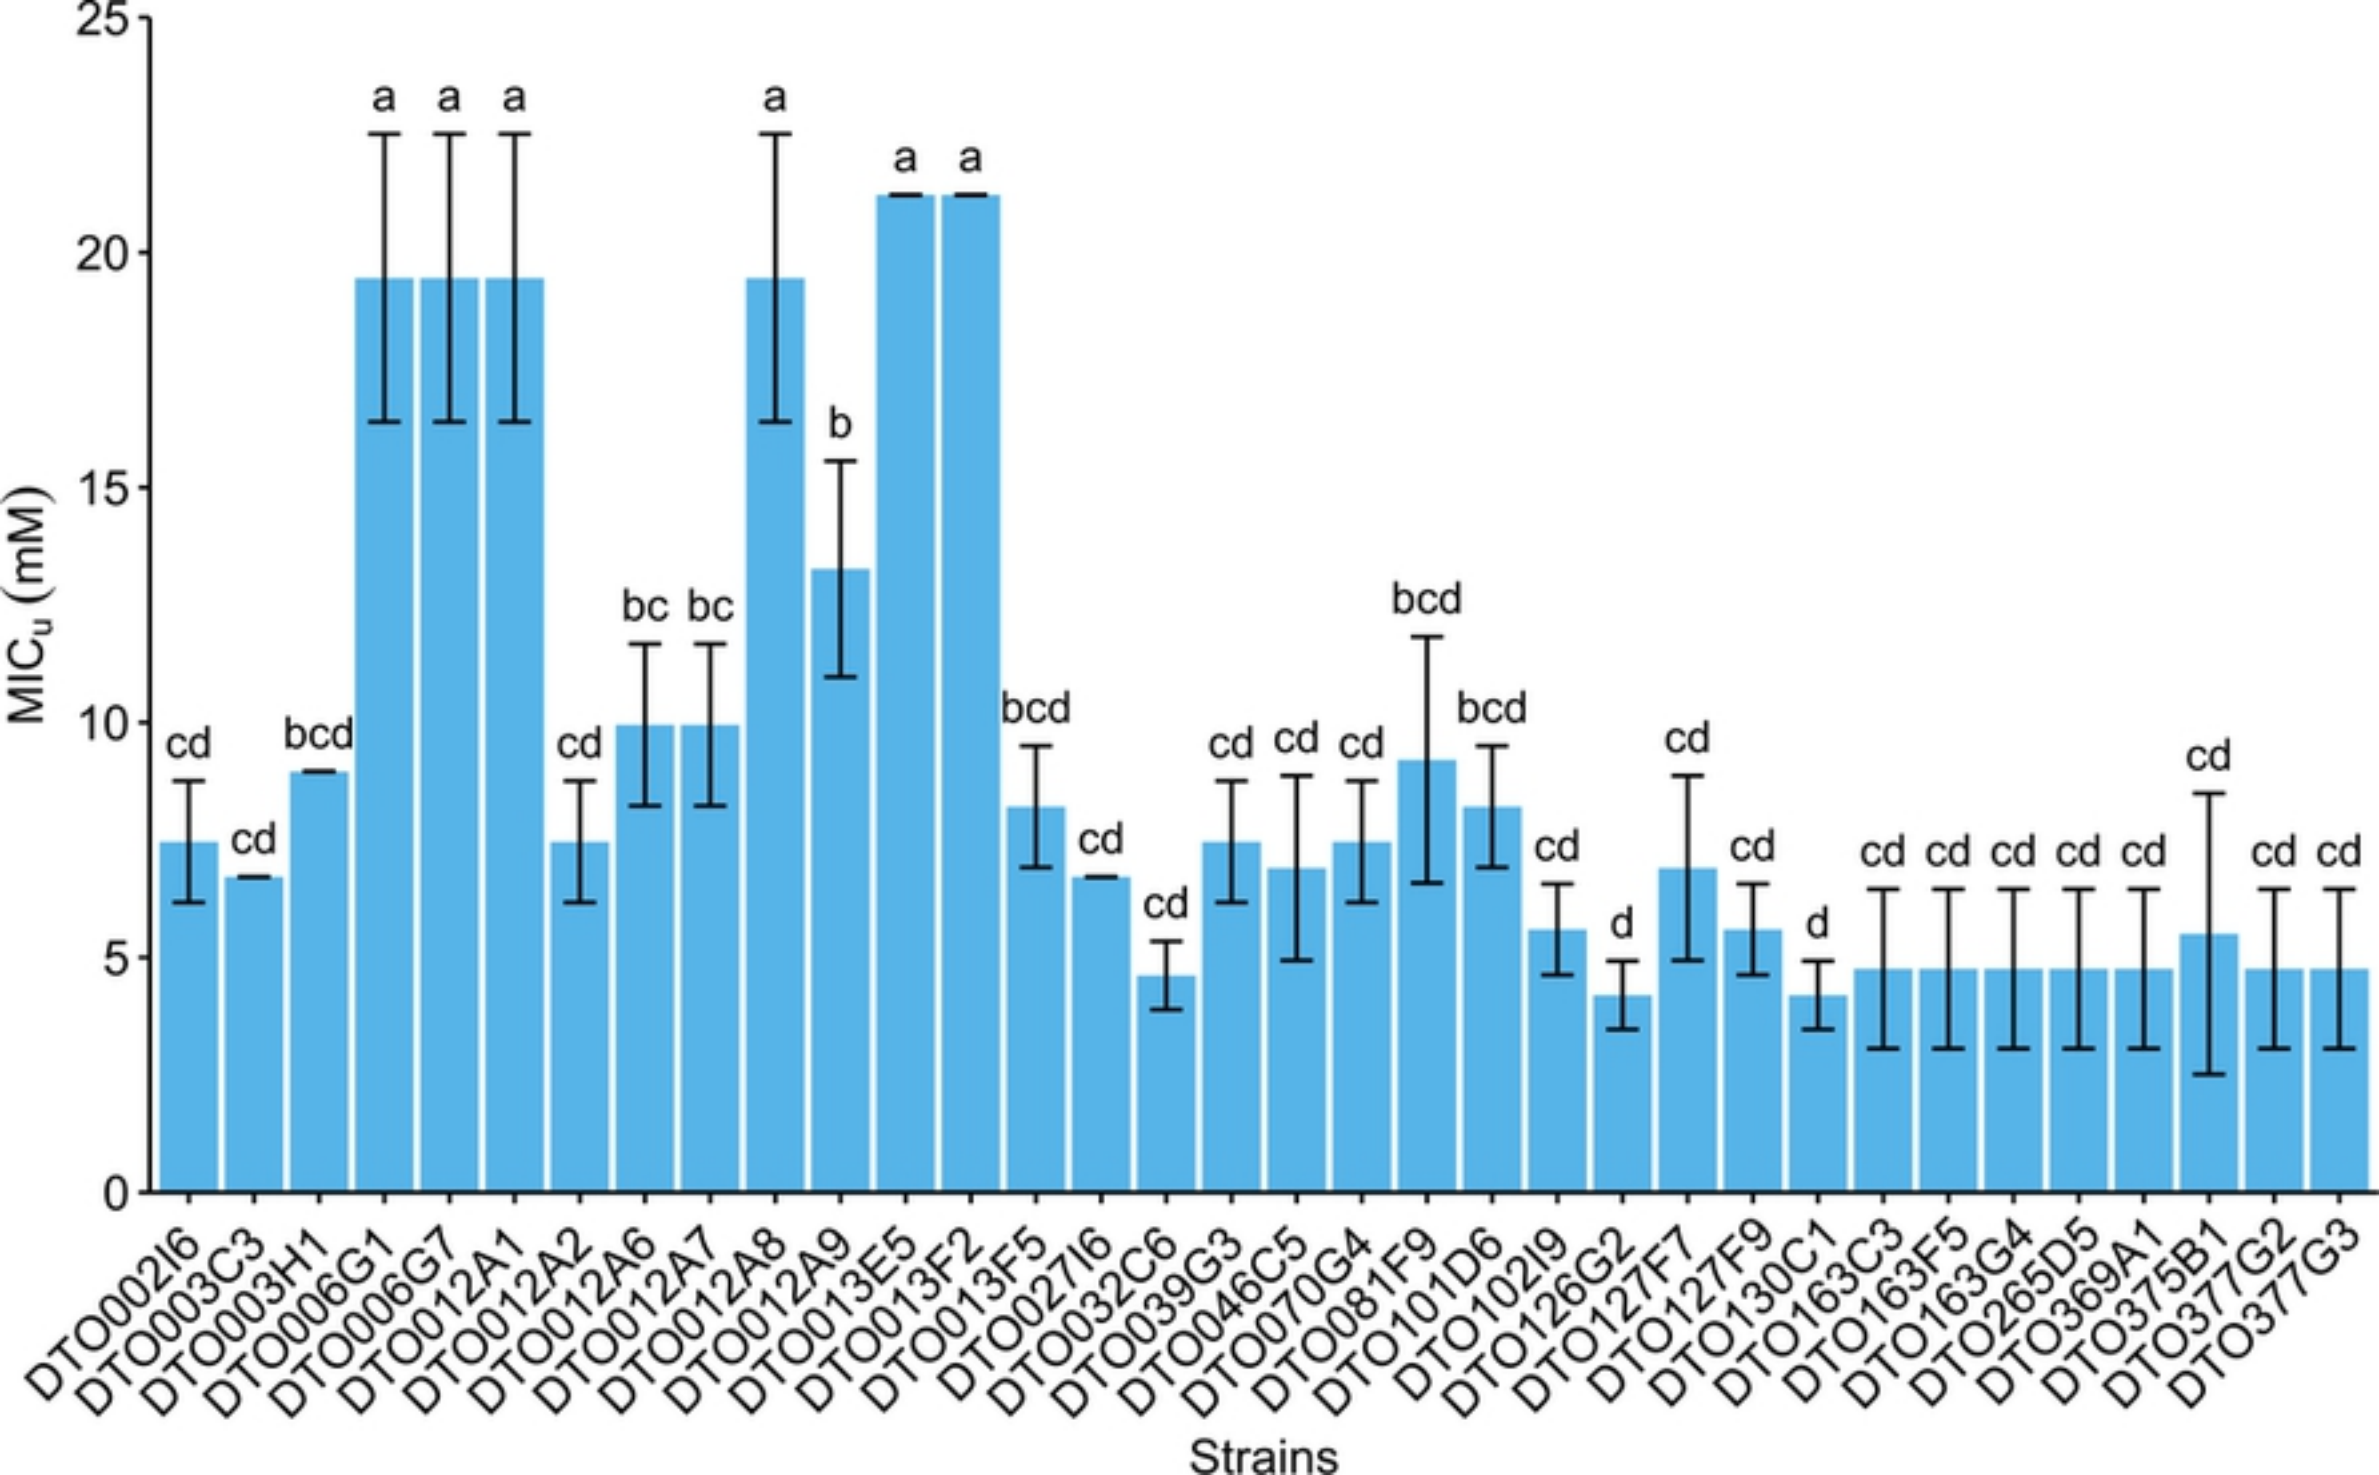



*P.rubens*

- DTO127F7
- DTO127F9
- DTO101D6
- DTO046C5
- DTO012A1
- DTO013F2
- DTO013E5
- DTO012A8
- DTO163F5
- DTO163G4
- DTO032C6
- DTO012A9
- DTO012A6
- 92  
- DTO013F5
- DTO102I9
- 93  
- DTO369A1
- 95  
- DTO002I6
- DTO003H1
- DTO130C1
- DTO003C3
- DTO163C3
- DTO006G7
- DTO006G1
- DTO081F9
- DTO039G3
- DTO027I6
- DTO126G2
- DTO377G3
- 99  
- DTO375B1
- DTO377G2
- 64  
- DTO012A7
- 59  
- DTO012A2
- 99  
- DTO0070G2
- DTO265D5

Tree scale: 0.001

bioRxiv preprint doi: <https://doi.org/10.1101/2022.02.10.479849>; this version posted February 10, 2022. The copyright holder for this preprint (which was not certified by peer review) is the author/funder, who has granted bioRxiv a license to display the preprint in perpetuity. It is made available under aCC-BY 4.0 International license.

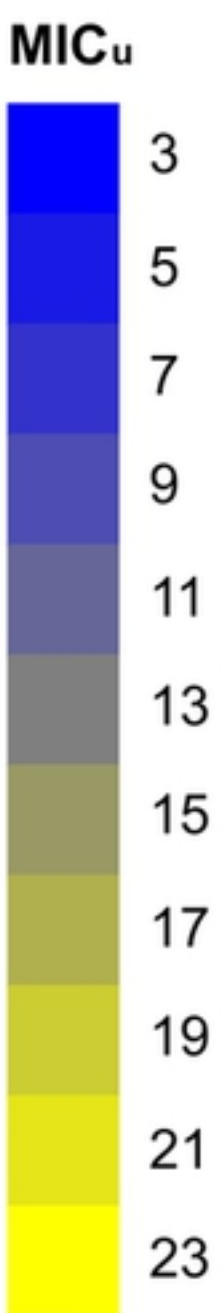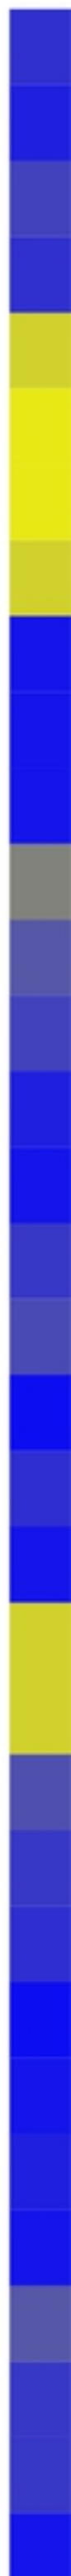

scaffold 043

0 20 40 60 80 100 120 140 160 Kb 180

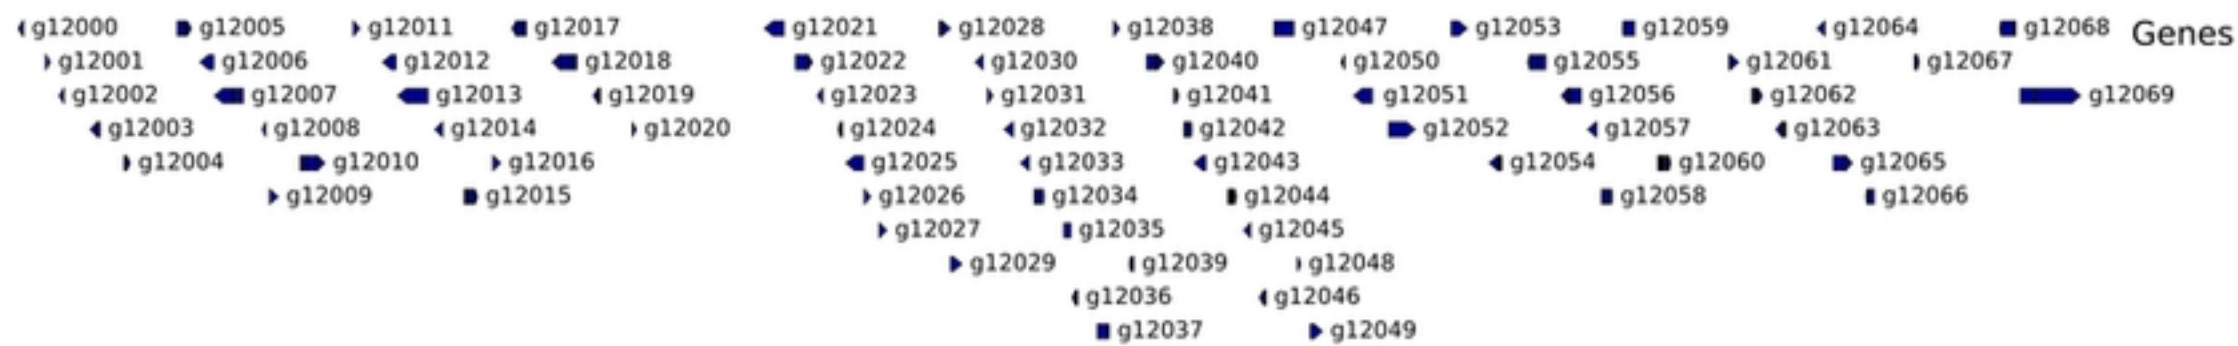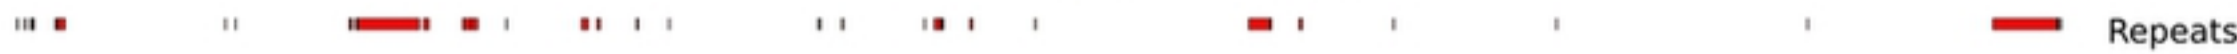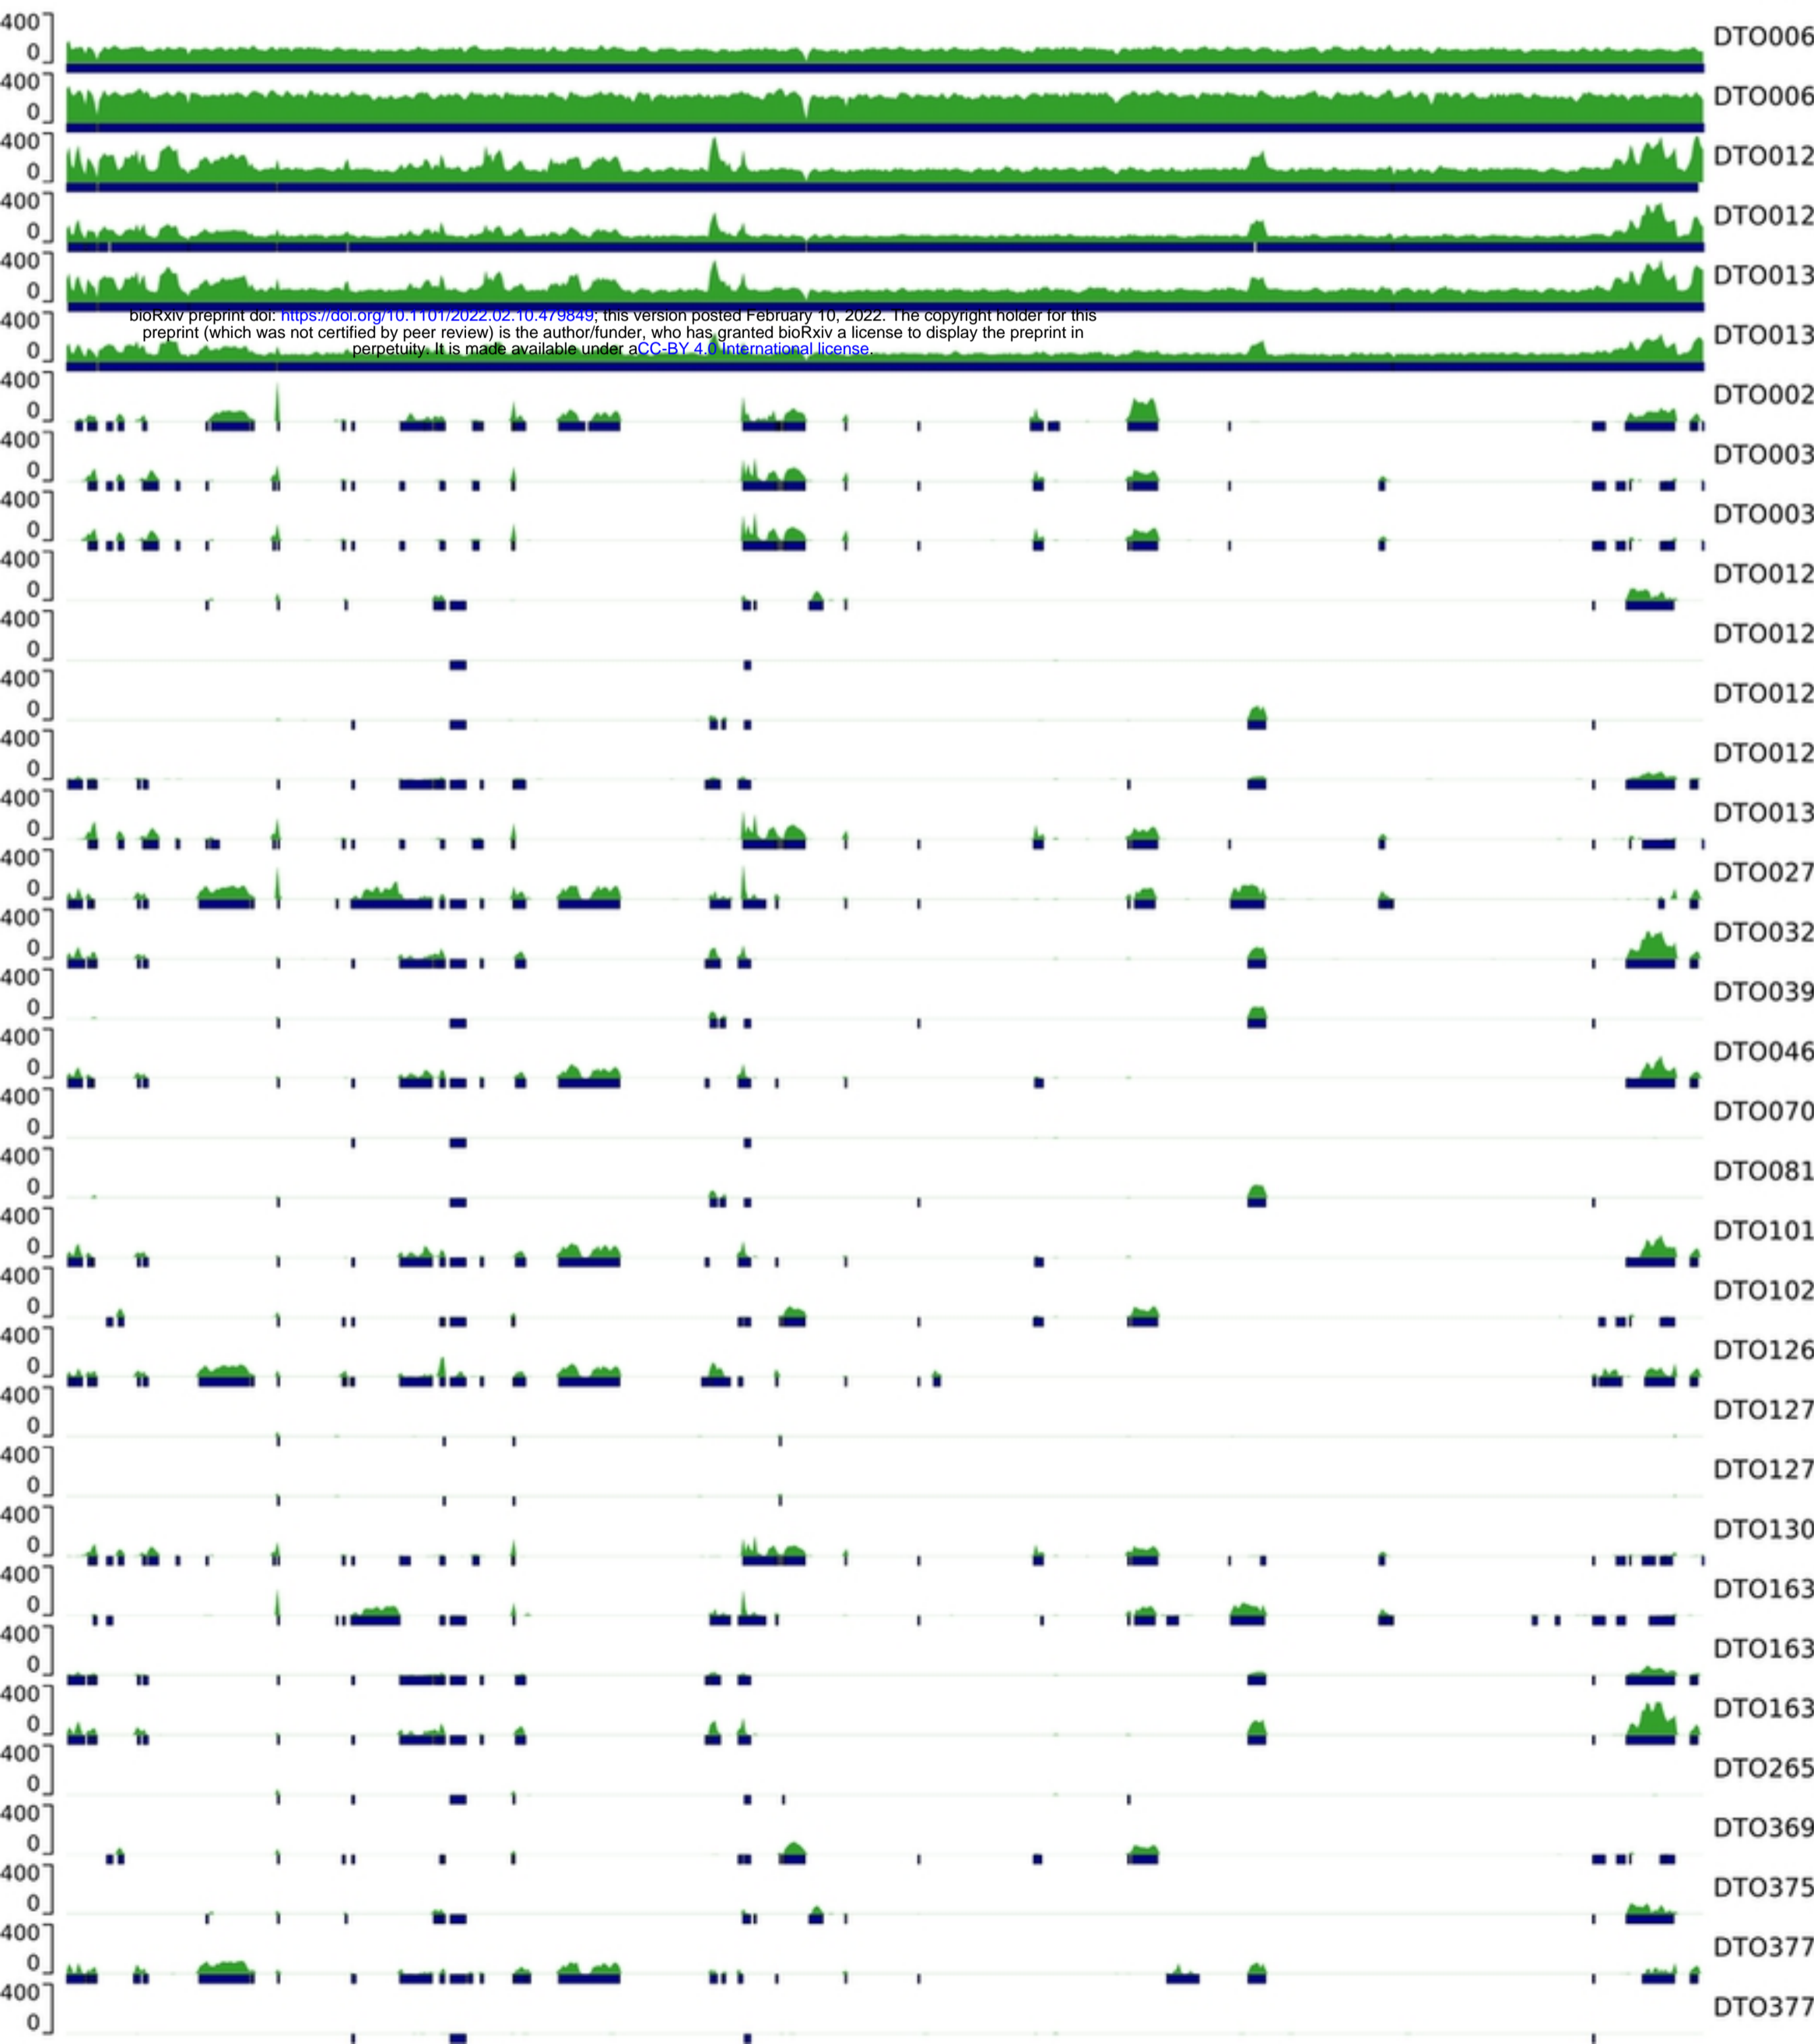

bioRxiv preprint doi: <https://doi.org/10.1101/2022.02.10.479849>; this version posted February 10, 2022. The copyright holder for this preprint (which was not certified by peer review) is the author/funder, who has granted bioRxiv a license to display the preprint in perpetuity. It is made available under aCC-BY 4.0 International license.

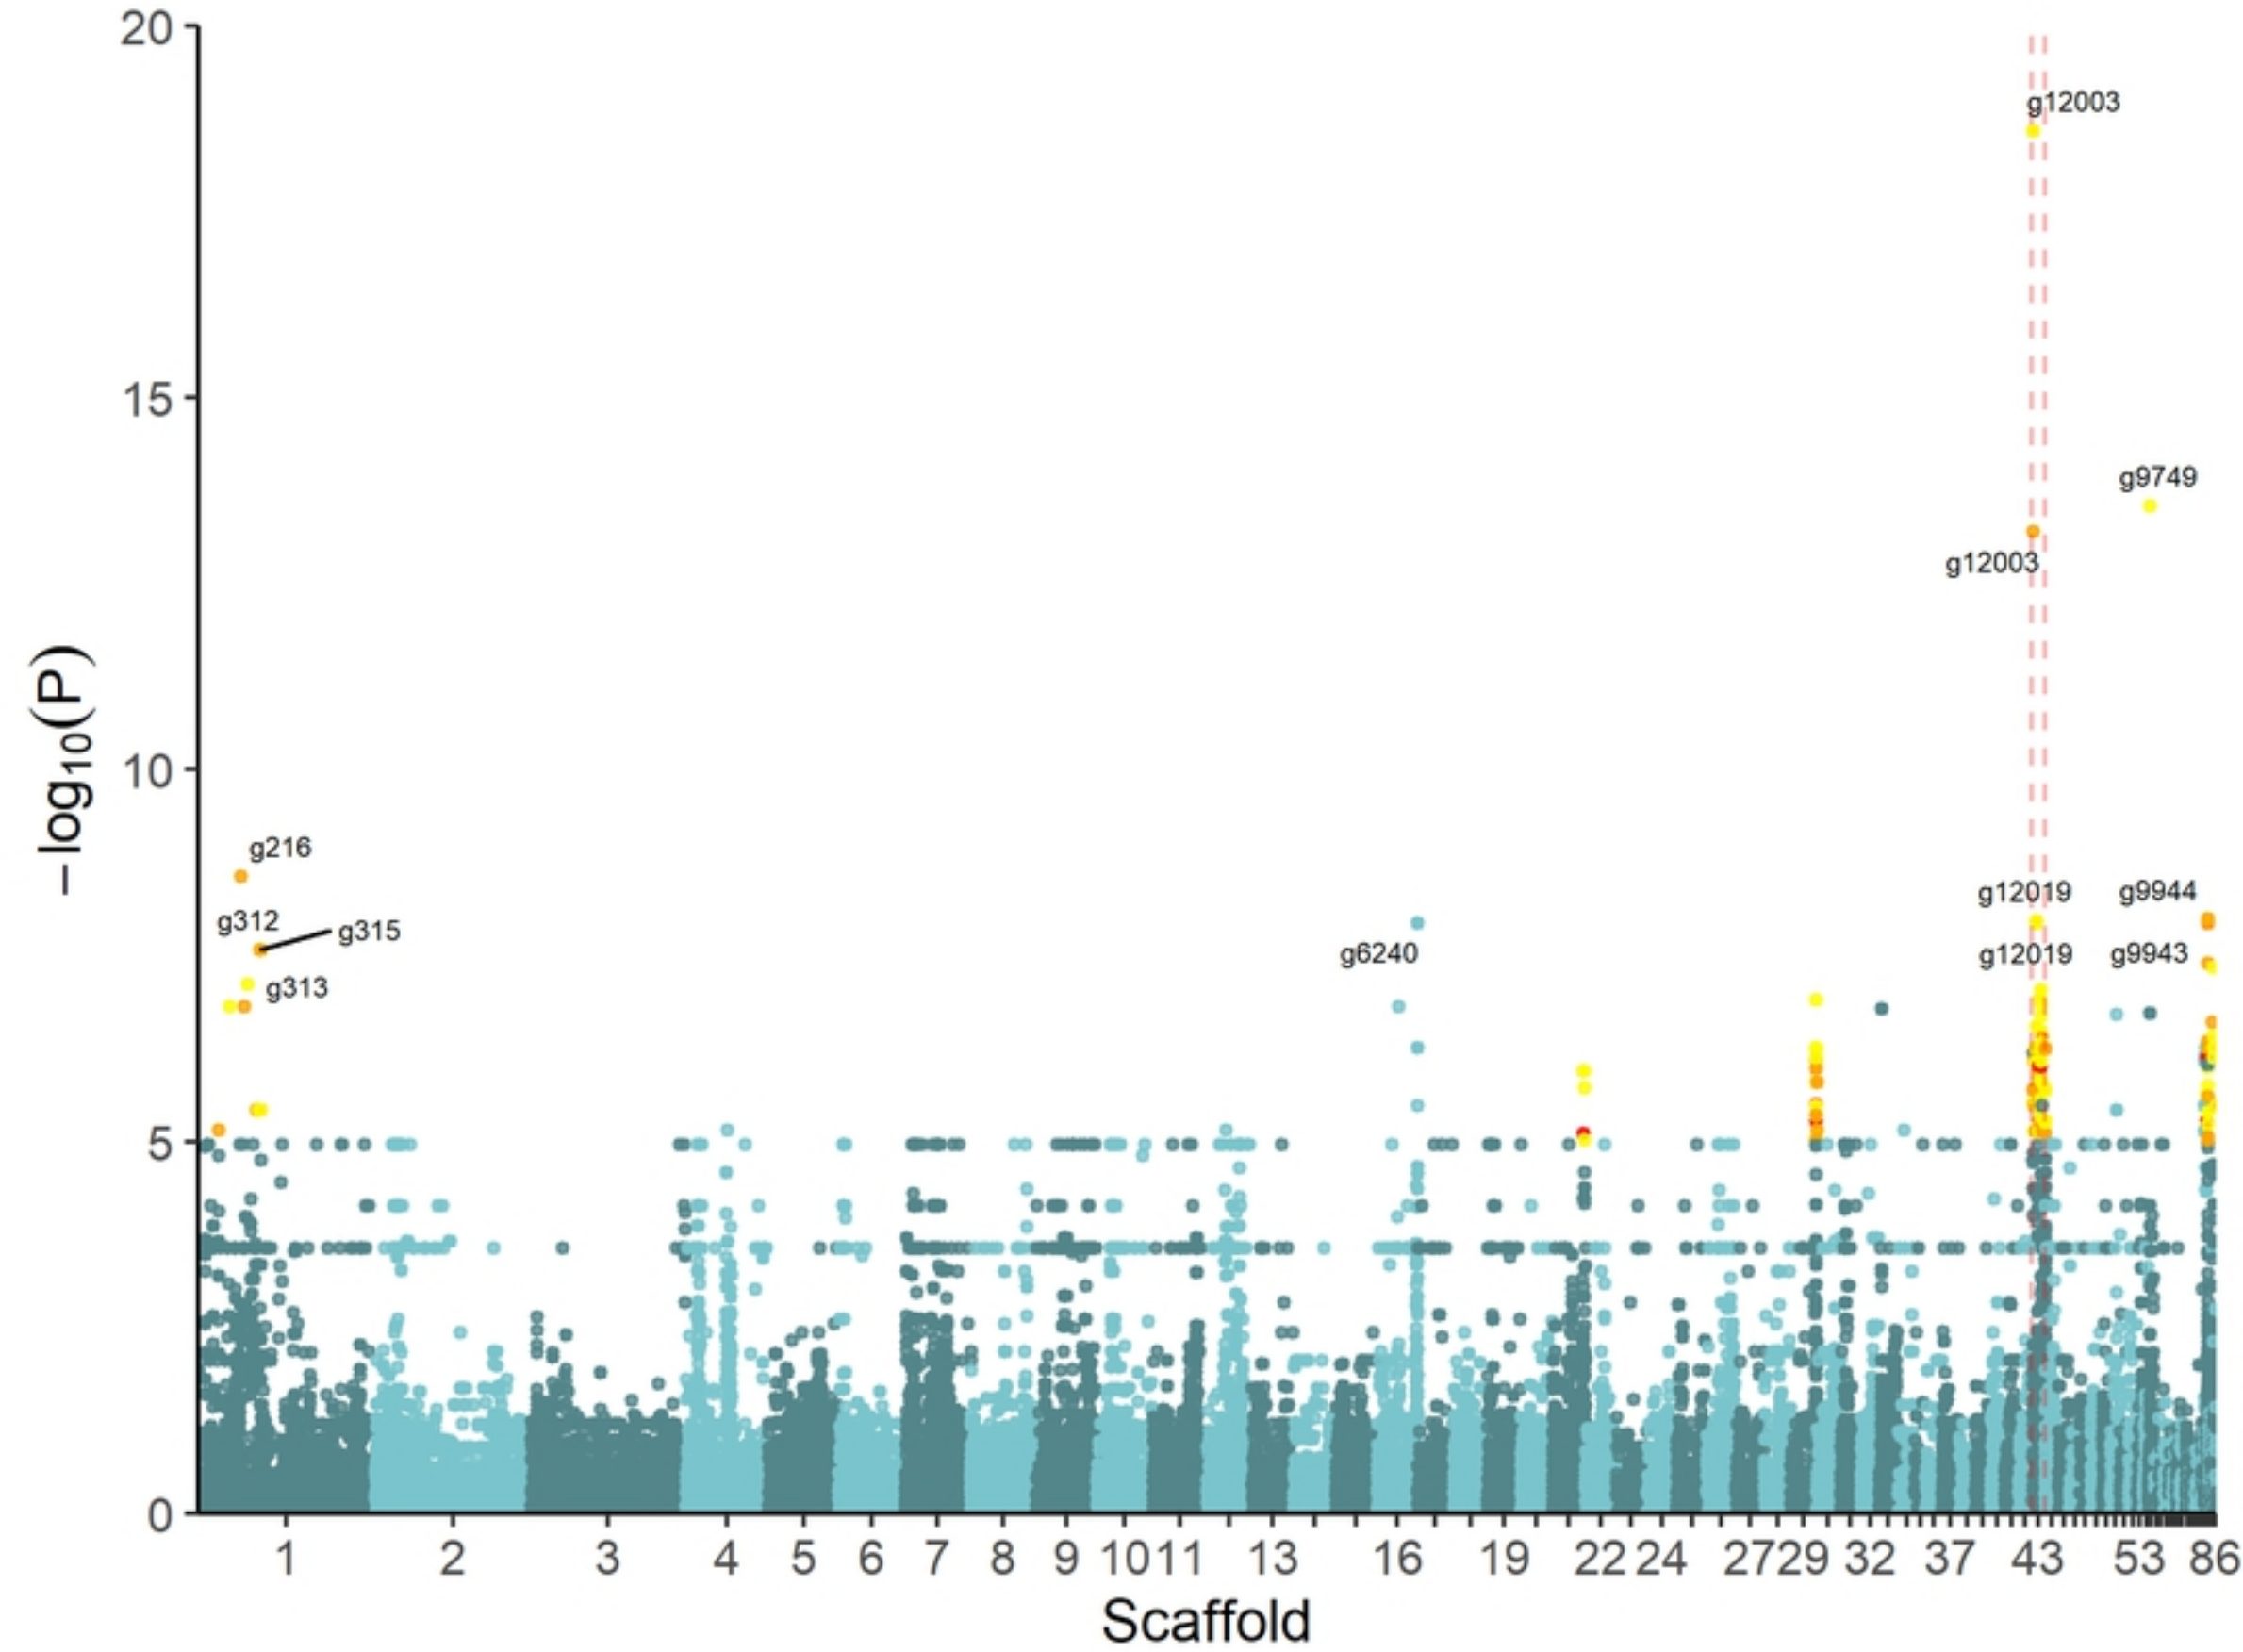



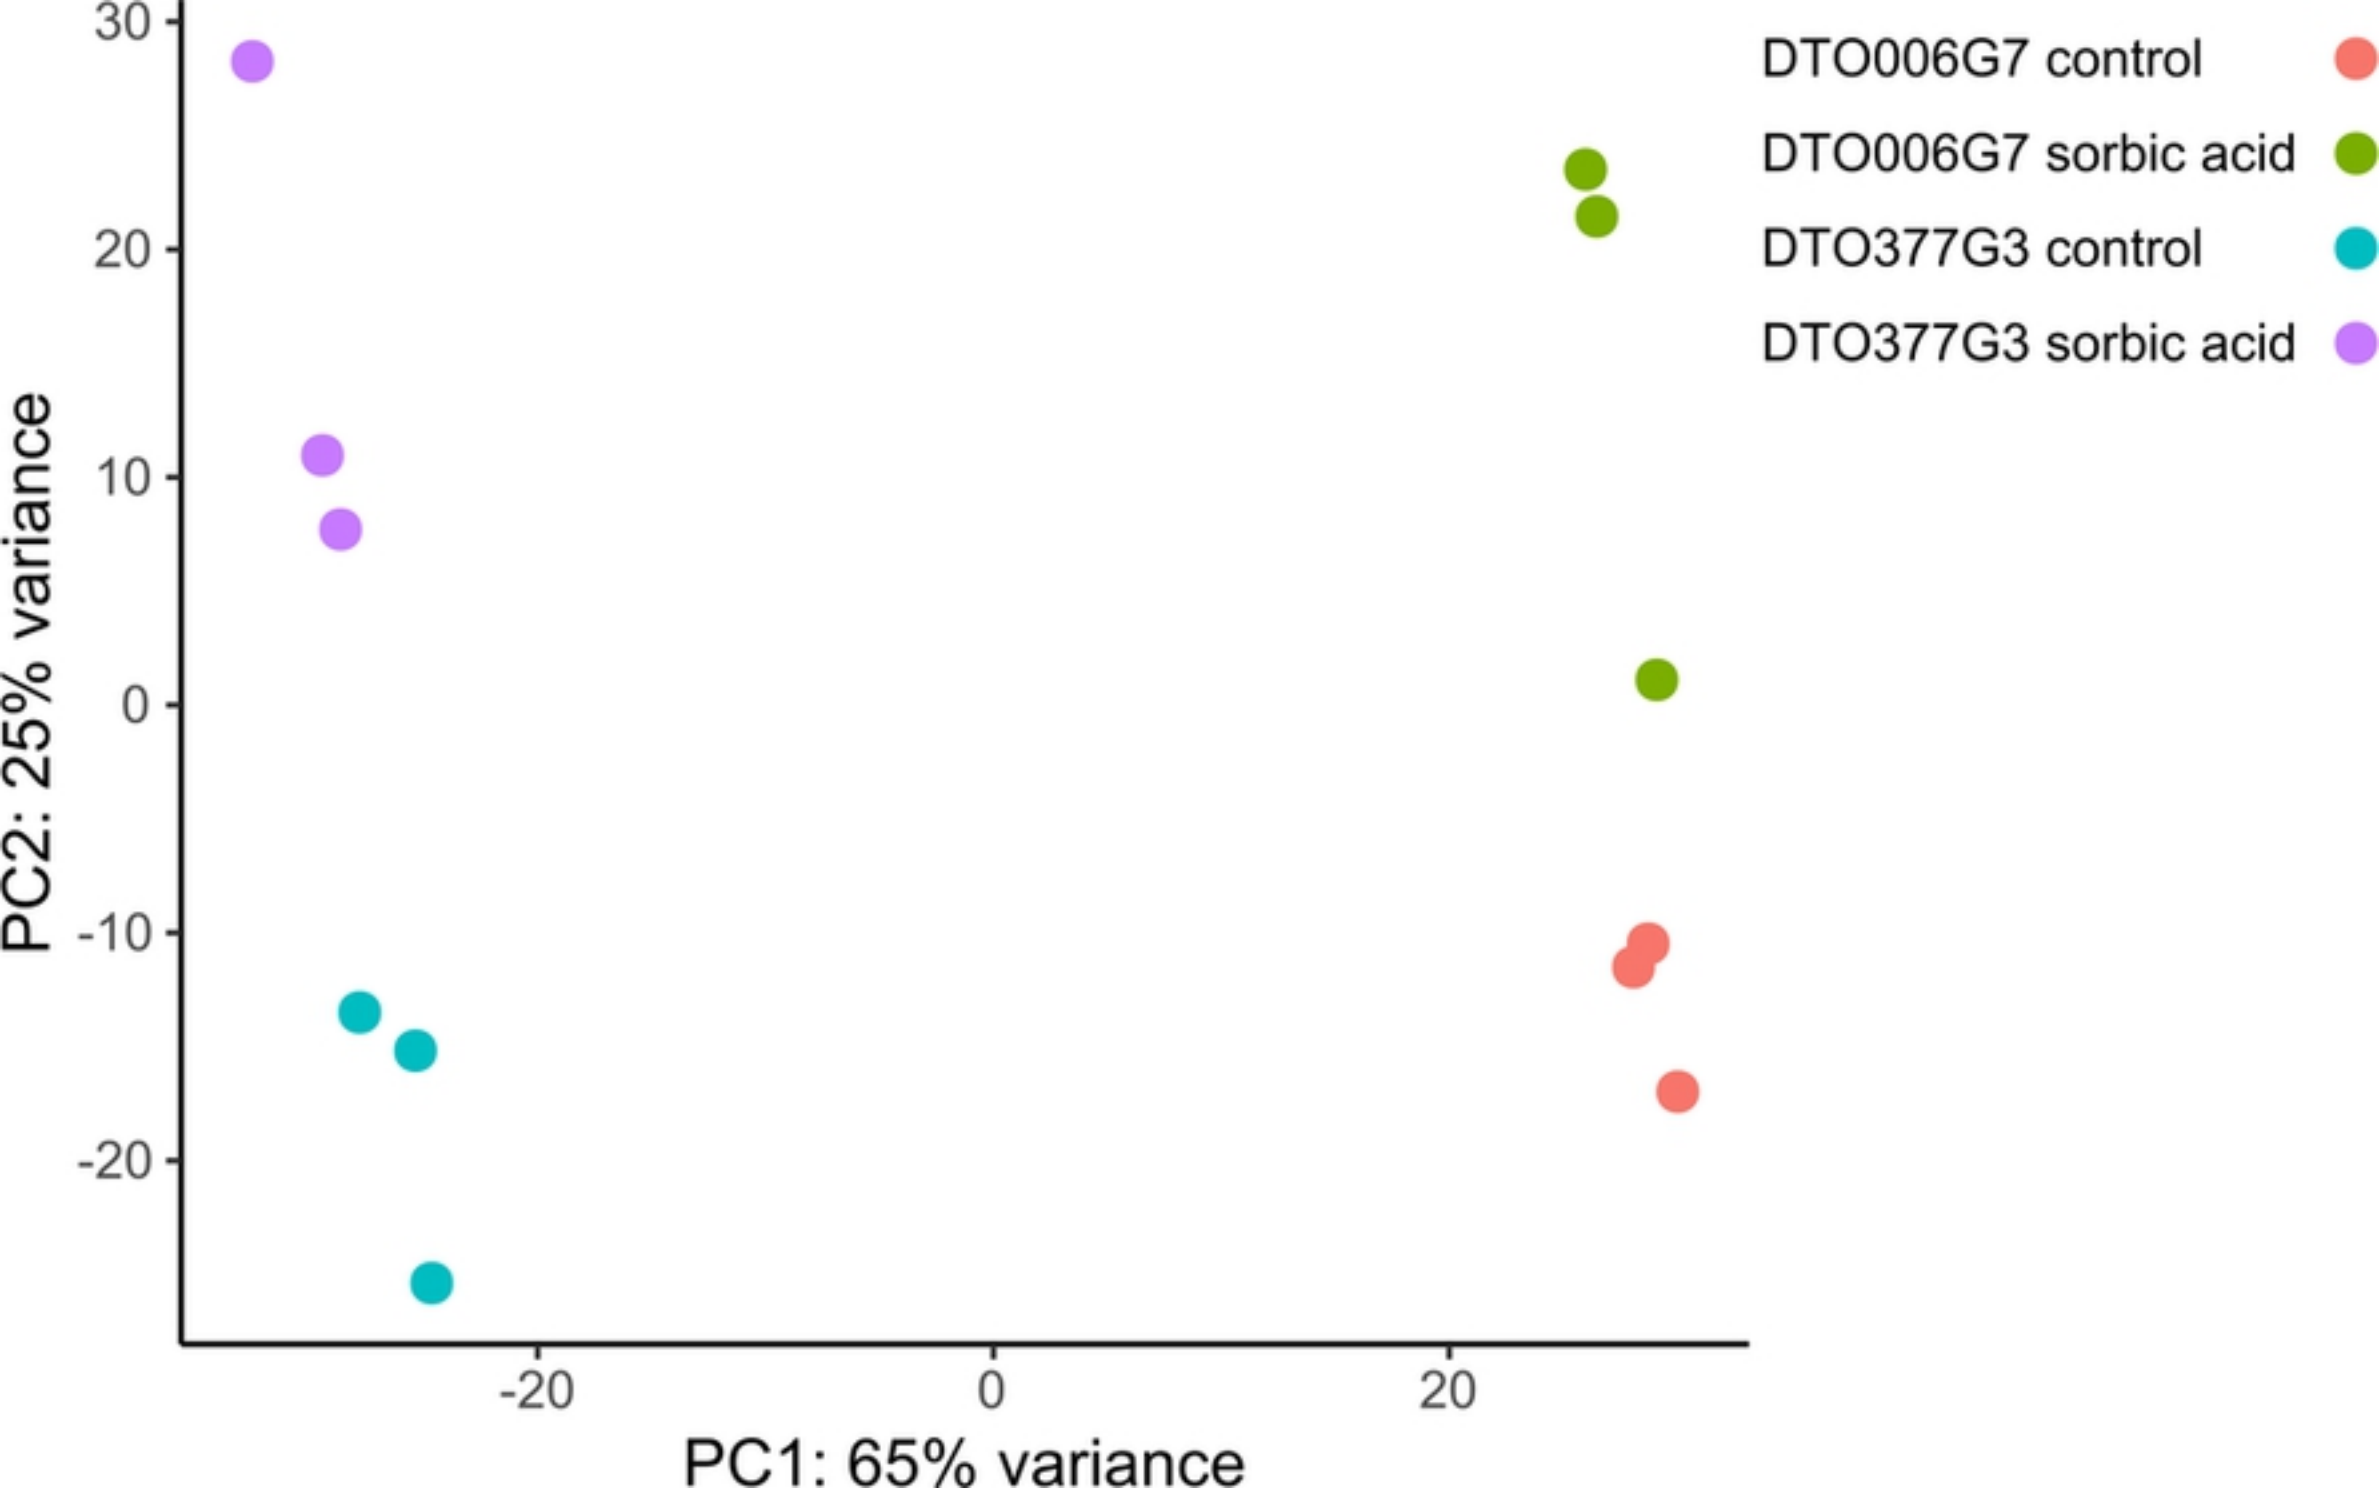

**A**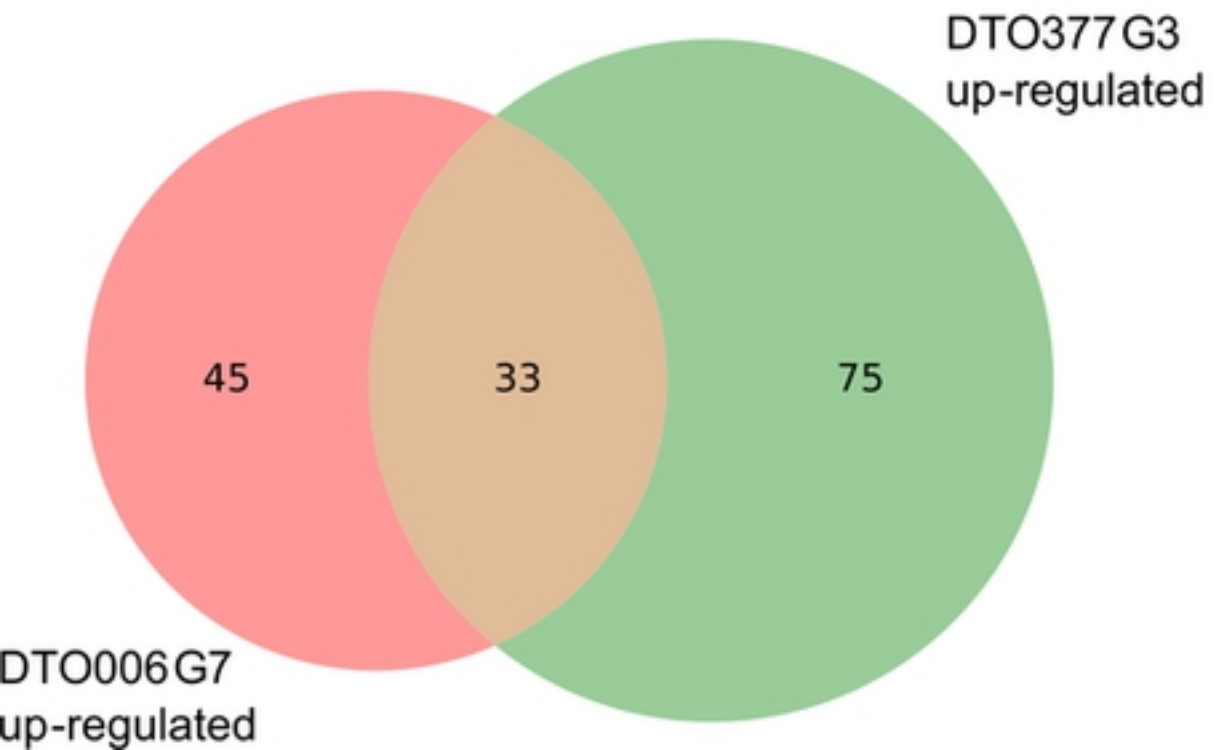**B**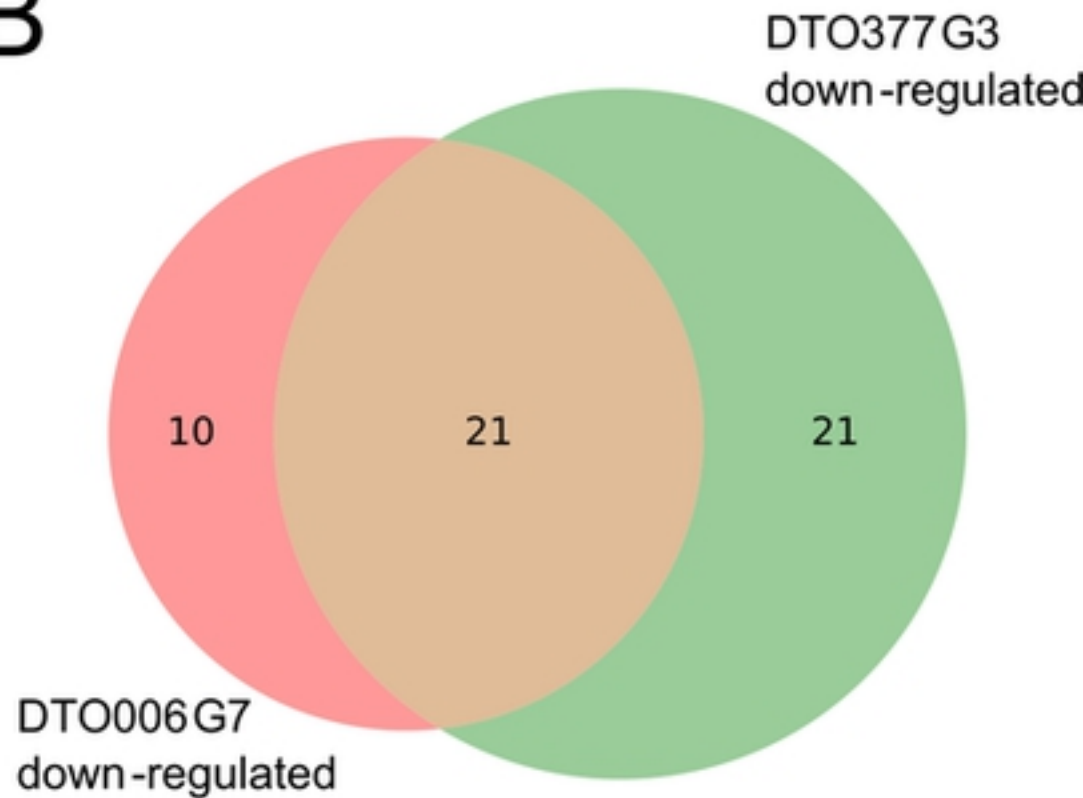

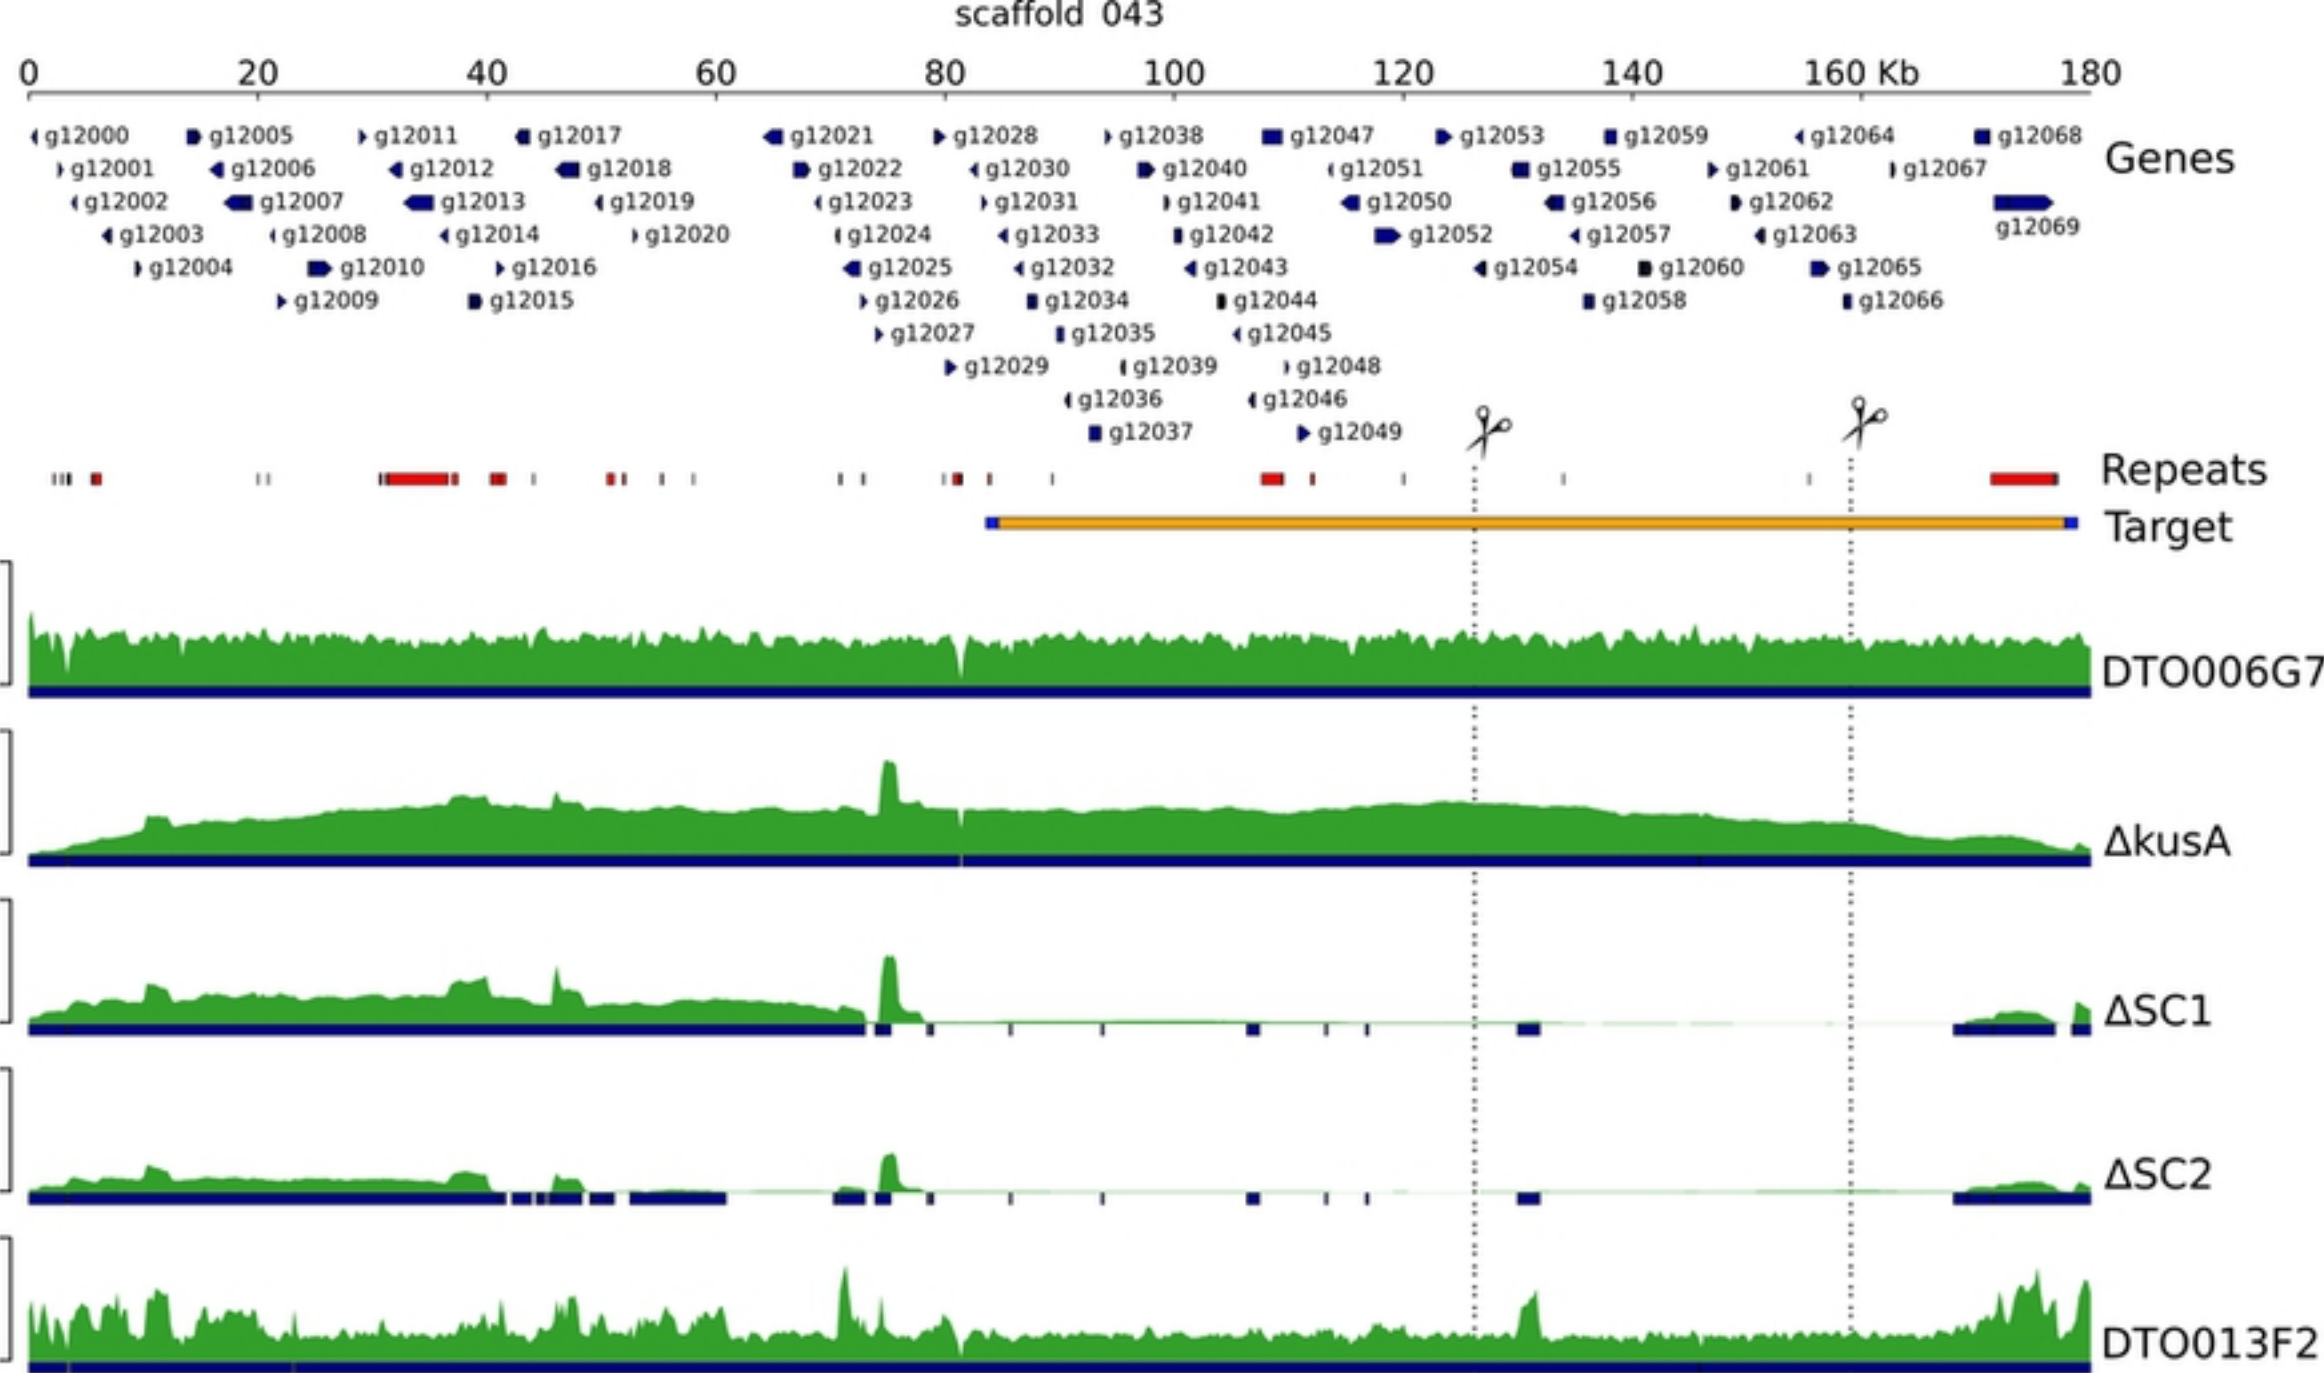

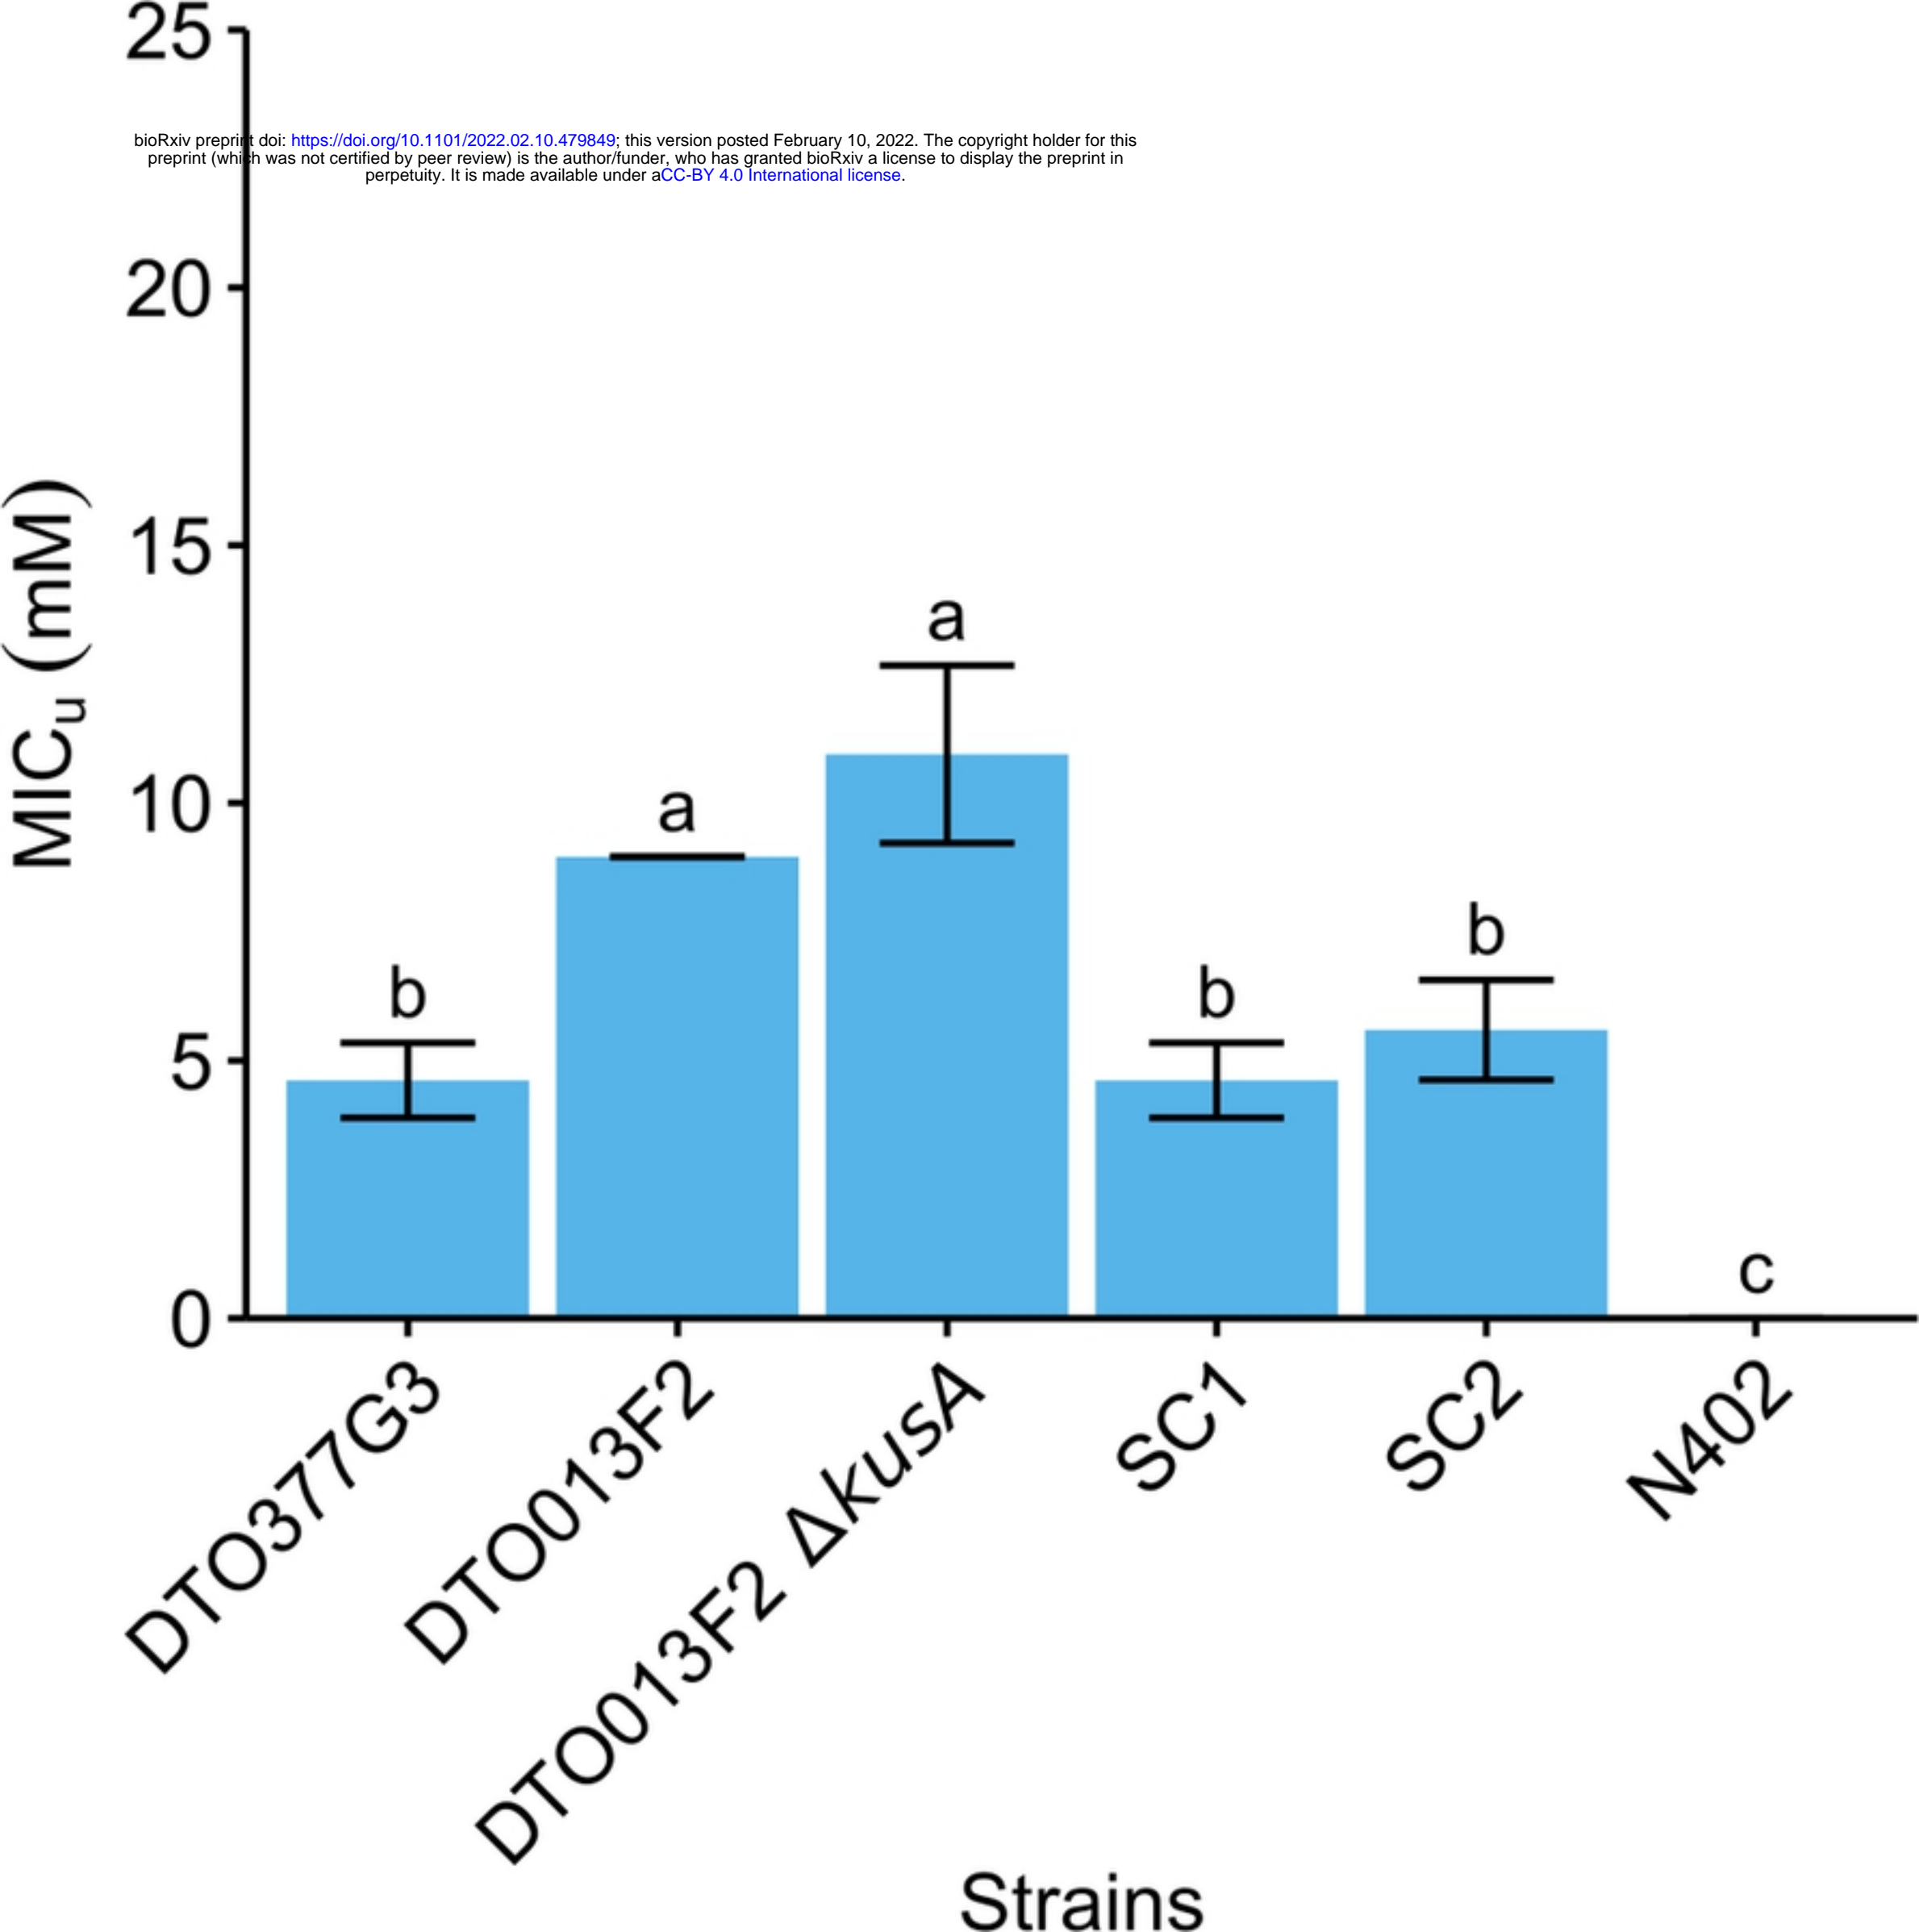

Source: https://www.biorxiv.org/content/10.1101/2022.02.10.479849v1.full.pdf
